# Supplementary material
Source: PubMed Central journal article supplement (PMC5898489)
Supplement: mmc1.pdf [file mmc1.pdf]

## **Appendix 1 - Study Surveys**

1. Family Demographics Form
2. BodyWorks program Surveys (parent and child entrance, exit, and follow-up surveys)
3. Children's Sleep Habits Questionnaire (Abbreviated)
4. Self-Report Physical Activity Form
5. Fitbit User Exit Survey

## Body Works Demographics Survey

Parent Name: \_\_\_\_\_

Child Name: \_\_\_\_\_

Starting Date: \_\_\_\_\_

Group: Monday          Wednesday

1. Indicate your race/ethnicity (check all that apply):

- |                                                            |                                                              |
|------------------------------------------------------------|--------------------------------------------------------------|
| <input type="checkbox"/> American Indian or Alaskan Native | <input type="checkbox"/> Native Hawaiian or Pacific Islander |
| <input type="checkbox"/> Asian                             | <input type="checkbox"/> White                               |
| <input type="checkbox"/> Black or African American         | <input type="checkbox"/> Other                               |
| <input type="checkbox"/> Hispanic or Latino                |                                                              |

2. Indicate your child's race/ethnicity (check all that apply):

- |                                                            |                                                              |
|------------------------------------------------------------|--------------------------------------------------------------|
| <input type="checkbox"/> American Indian or Alaskan Native | <input type="checkbox"/> Native Hawaiian or Pacific Islander |
| <input type="checkbox"/> Asian                             | <input type="checkbox"/> White                               |
| <input type="checkbox"/> Black or African American         | <input type="checkbox"/> Other                               |
| <input type="checkbox"/> Hispanic or Latino                |                                                              |

3. Do you speak a language other than English at Home? Yes / No

A) If yes, what is this language? \_\_\_\_\_

B) How well do you speak English?

- Very well
- Well
- Not well
- Not at all

4. Zip code of your home: \_\_\_\_\_

5. What type of Residence do you live in? Apartment / House

6. What is the total income of your household?

- |                                               |                                                 |
|-----------------------------------------------|-------------------------------------------------|
| <input type="checkbox"/> Less than \$10,000   | <input type="checkbox"/> \$60,000 to \$69,999   |
| <input type="checkbox"/> \$10,000 to \$19,999 | <input type="checkbox"/> \$70,000 to \$79,999   |
| <input type="checkbox"/> \$20,000 to \$29,999 | <input type="checkbox"/> \$80,000 to \$89,999   |
| <input type="checkbox"/> \$30,000 to \$39,999 | <input type="checkbox"/> \$90,000 to \$99,999   |
| <input type="checkbox"/> \$40,000 to \$49,999 | <input type="checkbox"/> \$100,000 to \$149,999 |
| <input type="checkbox"/> \$50,000 to \$59,999 | <input type="checkbox"/> \$150,000 or more      |

6. How many adults live in your home? \_\_\_\_\_

7. How many children live in your home? \_\_\_\_\_

8. Is there an adult at home most of the time when your child is at home? Yes / No

9. What type of transportation do you take to Body Works?

- |                                      |                                         |                                                                    |
|--------------------------------------|-----------------------------------------|--------------------------------------------------------------------|
| <input type="checkbox"/> Private Car | <input type="checkbox"/> Public Transit | <input type="checkbox"/> Got a ride with a friend or family member |
|--------------------------------------|-----------------------------------------|--------------------------------------------------------------------|

**Appendix C: Outcome Evaluation Instruments -  
Parent/Caregiver Entrance Survey**

Form Approved OMB No. 0990-0385  
Exp. Date: 12/31/2014

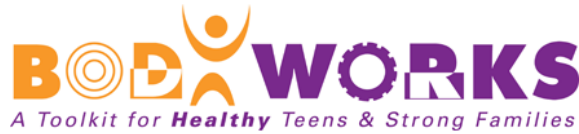

**Parent/Caregiver Entrance Survey**

The Office on Women’s Health is trying to find out how well the BodyWorks program helps you, your child, and the rest of your family. You will help improve the program by taking this survey.

This survey will take you about 20 minutes to complete. It includes questions about the *BodyWorks* program, your eating and physical activity habits, and about your children. When the survey asks you about “your children,” please think of the children who will be participating in *BodyWorks* as you answer. Unless the directions say otherwise, please choose one response for each question. Your survey answers are private.

|                                                              |               |              |
|--------------------------------------------------------------|---------------|--------------|
| Please write down <b>YOUR first and last initials:</b>       |               |              |
| <i>[Example: Jane Smith is J.S.; Jane Doe-Smith is J.S.]</i> | _____         | _____        |
|                                                              | First Initial | Last Initial |

|                                                                                                                                                                                                   |                                                          |                                                          |
|---------------------------------------------------------------------------------------------------------------------------------------------------------------------------------------------------|----------------------------------------------------------|----------------------------------------------------------|
| Please write down the <b>MONTH and YEAR of BIRTH of the children</b> participating in the BodyWorks Program with you.<br><i>[Example: Write 05/95 if your child’s birthday is in May of 1995]</i> |                                                          |                                                          |
| CHILD #1:<br>_____ / _____<br>MM      YY                                                                                                                                                          | CHILD #2 (IF APPLICABLE):<br>_____ / _____<br>MM      YY | CHILD #3 (IF APPLICABLE):<br>_____ / _____<br>MM      YY |

|                                                                   |                                                                    |                                                     |
|-------------------------------------------------------------------|--------------------------------------------------------------------|-----------------------------------------------------|
| <b>1. How did you hear about BodyWorks? (Choose one or more.)</b> |                                                                    |                                                     |
| <input type="checkbox"/> My child(ren)                            | <input type="checkbox"/> Doctor or other health care provider      | <input type="checkbox"/> Workplace                  |
| <input type="checkbox"/> Other family member                      | <input type="checkbox"/> Church, temple, or other place of worship | <input type="checkbox"/> Flyer/Brochure             |
| <input type="checkbox"/> Friend/Neighbor                          | <input type="checkbox"/> Community organization                    | <input type="checkbox"/> Newspaper, TV, or radio ad |
| <input type="checkbox"/> School/Teacher                           | <input type="checkbox"/> Other _____                               |                                                     |

|                                                                                                                         |
|-------------------------------------------------------------------------------------------------------------------------|
| <b>2. What made you want to come to the BodyWorks program? (Choose one or more.)</b>                                    |
| <input type="checkbox"/> I wanted to learn more about nutrition and/or preparing healthier meals for my family          |
| <input type="checkbox"/> I wanted to learn more about being physically active                                           |
| <input type="checkbox"/> I was concerned about my child/children’s health and/or weight                                 |
| <input type="checkbox"/> I was concerned about my own health and/or weight                                              |
| <input type="checkbox"/> I wanted to participate in an activity with my child/children                                  |
| <input type="checkbox"/> I wanted group support to help me in my efforts to change the way my family eats and exercises |
| <input type="checkbox"/> Other: _____                                                                                   |

According to the Paperwork Reduction Act of 1995, no persons are required to respond to a collection of information unless it displays a valid OMB control number. The valid OMB control number for this information collection is 0990-0385. The time required to complete this information collection is estimated to average 20 minutes per response, including the time to review instructions, search existing data resources, gather the data needed, and complete and review the information collection. If you have comments concerning the accuracy of the time estimate(s) or suggestions for improving this form, please write to: U.S. Department of Health & Human Services, OS/OCIO/PRA, 200 Independence Ave., S.W., Suite 537-H, Washington D.C. 20201, Attention: PRA Reports Clearance Officer

**3. Right now, how do you feel about making changes to your eating habits?**

I have not thought about making any changes.

I plan to make changes later, maybe in 6 months.

I want to make changes soon, maybe in the next month.

I am making changes right now, but this has been for less than 6 months.

I have made changes and have kept up with them for 6 months or longer.

---

**4. How much do you want to make changes to your eating habits?**

Not at all

Very little

Some

A lot

---

**5. Right now, how do you feel about making changes to your exercise habits?**

I have not thought about making any changes.

I plan to make changes in the future, maybe in 6 months.

I want to make changes soon, maybe in the next month.

I am making changes right now, but this has been for less than 6 months.

I have made changes and have kept up with them for 6 months or longer.

---

**6. How much do you want to make changes to your exercise habits?**

Not at all

Very little

Some

A lot

| 7a. How important to YOU is...                                                                                                                       | Not At All Important     | Not Very Important       | Important                | Very Important           |
|------------------------------------------------------------------------------------------------------------------------------------------------------|--------------------------|--------------------------|--------------------------|--------------------------|
| a. Eating a healthy mix of foods like fruits, vegetables, whole grains, low-fat or fat-free dairy foods, and protein foods?                          | <input type="checkbox"/> | <input type="checkbox"/> | <input type="checkbox"/> | <input type="checkbox"/> |
| b. Exercising moderately for a total of 2.5 hours per week?                                                                                          | <input type="checkbox"/> | <input type="checkbox"/> | <input type="checkbox"/> | <input type="checkbox"/> |
| c. Setting goals to improve your eating and physical activity habits?                                                                                | <input type="checkbox"/> | <input type="checkbox"/> | <input type="checkbox"/> | <input type="checkbox"/> |
| d. Writing in a journal about your eating and physical activity habits?                                                                              | <input type="checkbox"/> | <input type="checkbox"/> | <input type="checkbox"/> | <input type="checkbox"/> |
| e. Planning, shopping for, or making healthy foods for your family?                                                                                  | <input type="checkbox"/> | <input type="checkbox"/> | <input type="checkbox"/> | <input type="checkbox"/> |
| f. Preventing diseases that happen later in life, like heart disease, diabetes, and osteoporosis (a disease that causes bones to break more easily)? | <input type="checkbox"/> | <input type="checkbox"/> | <input type="checkbox"/> | <input type="checkbox"/> |

**Question 7b is about the children that came with you to BodyWorks.**

| <b>7b. How important is it to you that YOUR children are...</b>                                                             | <b>Not At All Important</b> | <b>Not Very Important</b> | <b>Important</b>         | <b>Very Important</b>    |
|-----------------------------------------------------------------------------------------------------------------------------|-----------------------------|---------------------------|--------------------------|--------------------------|
| a. Eating a healthy mix of foods like fruits, vegetables, whole grains, low-fat or fat-free dairy foods, and protein foods? | <input type="checkbox"/>    | <input type="checkbox"/>  | <input type="checkbox"/> | <input type="checkbox"/> |
| b. Exercising for one hour every day?                                                                                       | <input type="checkbox"/>    | <input type="checkbox"/>  | <input type="checkbox"/> | <input type="checkbox"/> |
| c. Setting goals to improve their eating and physical activity habits?                                                      | <input type="checkbox"/>    | <input type="checkbox"/>  | <input type="checkbox"/> | <input type="checkbox"/> |
| d. Writing in a journal about their eating and physical activity habits?                                                    | <input type="checkbox"/>    | <input type="checkbox"/>  | <input type="checkbox"/> | <input type="checkbox"/> |
| e. Helping you plan, shop for, or make healthy foods?                                                                       | <input type="checkbox"/>    | <input type="checkbox"/>  | <input type="checkbox"/> | <input type="checkbox"/> |
| f. Preventing diseases later in life, like heart disease, diabetes, and osteoporosis?                                       | <input type="checkbox"/>    | <input type="checkbox"/>  | <input type="checkbox"/> | <input type="checkbox"/> |

| <b>8a. Do you think you can ...</b>                                                               | <b>No, Not At All</b>    | <b>No, Not Really</b>    | <b>Yes, A Little</b>     | <b>Yes, Definitely</b>   |
|---------------------------------------------------------------------------------------------------|--------------------------|--------------------------|--------------------------|--------------------------|
| a. Talk with your family about how you can all eat healthier foods or get more physical activity? | <input type="checkbox"/> | <input type="checkbox"/> | <input type="checkbox"/> | <input type="checkbox"/> |
| b. Provide healthy meals each week (includes planning, shopping, or food preparation)?            | <input type="checkbox"/> | <input type="checkbox"/> | <input type="checkbox"/> | <input type="checkbox"/> |
| c. Use nutrition facts labels on packages to pick healthy foods?                                  | <input type="checkbox"/> | <input type="checkbox"/> | <input type="checkbox"/> | <input type="checkbox"/> |
| d. Choose healthy foods and drinks at home?                                                       | <input type="checkbox"/> | <input type="checkbox"/> | <input type="checkbox"/> | <input type="checkbox"/> |
| e. Choose healthy foods and drinks at restaurants, including fast food restaurants?               | <input type="checkbox"/> | <input type="checkbox"/> | <input type="checkbox"/> | <input type="checkbox"/> |
| f. Plan what physical activities you will do for the week?                                        | <input type="checkbox"/> | <input type="checkbox"/> | <input type="checkbox"/> | <input type="checkbox"/> |
| g. Exercise moderately for a total of 2.5 hours per week?                                         | <input type="checkbox"/> | <input type="checkbox"/> | <input type="checkbox"/> | <input type="checkbox"/> |
| h. Exercise even if there are barriers, like if you are too tired or very busy?                   | <input type="checkbox"/> | <input type="checkbox"/> | <input type="checkbox"/> | <input type="checkbox"/> |

**Question 8b is about the children that came with you to BodyWorks**

| <b>8b. Do you think you can help your children to...</b>                                                                                  | <b>No, Not At All</b>    | <b>No, Not Really</b>    | <b>Yes, A Little</b>     | <b>Yes, definitely</b>   |
|-------------------------------------------------------------------------------------------------------------------------------------------|--------------------------|--------------------------|--------------------------|--------------------------|
| a. Assist you in providing healthy meals each week (includes planning, shopping, or preparing food)?                                      | <input type="checkbox"/> | <input type="checkbox"/> | <input type="checkbox"/> | <input type="checkbox"/> |
| b. Choose healthy foods and drinks, including foods with calcium and vitamin D?                                                           | <input type="checkbox"/> | <input type="checkbox"/> | <input type="checkbox"/> | <input type="checkbox"/> |
| c. Choose healthy foods and drinks at restaurants, including fast food restaurants?                                                       | <input type="checkbox"/> | <input type="checkbox"/> | <input type="checkbox"/> | <input type="checkbox"/> |
| d. Limit computer and TV time so your children can spend more time being active?                                                          | <input type="checkbox"/> | <input type="checkbox"/> | <input type="checkbox"/> | <input type="checkbox"/> |
| e. Exercise for 60 minutes each day, including bone strengthening activities like running, jumping rope, or other high-impact activities? | <input type="checkbox"/> | <input type="checkbox"/> | <input type="checkbox"/> | <input type="checkbox"/> |

|                                                                                                                                                                                                                                                                                                                 |  |  |  |  |
|-----------------------------------------------------------------------------------------------------------------------------------------------------------------------------------------------------------------------------------------------------------------------------------------------------------------|--|--|--|--|
| <b>9. The most important time in life for building strong bones is when you are a/an...</b>                                                                                                                                                                                                                     |  |  |  |  |
| <input type="checkbox"/> Baby or young child (ages 0-8)<br><input type="checkbox"/> Preteen or teen (ages 9-18)<br><input type="checkbox"/> Young adult (ages 19-29)<br><input type="checkbox"/> Adult (ages 30 to 54)<br><input type="checkbox"/> Older adult (age 55+)<br><input type="checkbox"/> Don't know |  |  |  |  |
| <b>10. The amount of food you choose to eat for a meal or a snack is a...</b>                                                                                                                                                                                                                                   |  |  |  |  |
| <input type="checkbox"/> Serving <input type="checkbox"/> Plate <input type="checkbox"/> Portion Size <input type="checkbox"/> Don't know                                                                                                                                                                       |  |  |  |  |
| <b>11. A measured amount of food or drink that you can find on a nutrition facts label is the...</b>                                                                                                                                                                                                            |  |  |  |  |
| <input type="checkbox"/> Recipe <input type="checkbox"/> Portion Size <input type="checkbox"/> Serving <input type="checkbox"/> Don't know                                                                                                                                                                      |  |  |  |  |
| <b>12. The dangers of having an unhealthy diet can be: (Choose one or more.)</b>                                                                                                                                                                                                                                |  |  |  |  |
| <input type="checkbox"/> Not getting enough nutrients to grow and develop<br><input type="checkbox"/> Higher risk for diseases like osteoporosis or diabetes<br><input type="checkbox"/> Higher risk for being overweight<br><input type="checkbox"/> Don't know                                                |  |  |  |  |
| <b>13. Which foods contain calcium? (Choose one or more.)</b>                                                                                                                                                                                                                                                   |  |  |  |  |
| <input type="checkbox"/> Milk <input type="checkbox"/> Fortified orange juice <input type="checkbox"/> Peaches <input type="checkbox"/> Water <input type="checkbox"/> Don't know                                                                                                                               |  |  |  |  |
| <b>14. Which foods contain vitamin D? (Choose one or more.)</b>                                                                                                                                                                                                                                                 |  |  |  |  |
| <input type="checkbox"/> Salmon <input type="checkbox"/> Chicken <input type="checkbox"/> Fortified Milk <input type="checkbox"/> Spinach <input type="checkbox"/> Don't know                                                                                                                                   |  |  |  |  |
| <b>15. Which sandwich has less fat?</b>                                                                                                                                                                                                                                                                         |  |  |  |  |
| <input type="checkbox"/> Fried chicken sandwich <input type="checkbox"/> Grilled chicken sandwich <input type="checkbox"/> They both have the same amount of fat <input type="checkbox"/> Don't know                                                                                                            |  |  |  |  |
| <b>16. How can physical activity help you? (Choose one or more.)</b>                                                                                                                                                                                                                                            |  |  |  |  |
| <input type="checkbox"/> Helps you control your weight <input type="checkbox"/> Lowers your chance of getting high blood pressure <input type="checkbox"/> Helps you feel less stressed <input type="checkbox"/> Decreases your vitamin C levels <input type="checkbox"/> Don't know                            |  |  |  |  |
| <b>17. To strengthen your bones you should:</b>                                                                                                                                                                                                                                                                 |  |  |  |  |
| <input type="checkbox"/> Swim 3 times a week <input type="checkbox"/> Do stretching exercises, like touching your toes <input type="checkbox"/> Do activities like jumping and dancing <input type="checkbox"/> Don't know                                                                                      |  |  |  |  |

| <b>18. Tell us about the <u>past 7 days</u>. On how many days did you...</b>                          | <b>0 Days</b>            | <b>1-2 Day</b>           | <b>3-4 Days</b>          | <b>5-7 Days</b>          |
|-------------------------------------------------------------------------------------------------------|--------------------------|--------------------------|--------------------------|--------------------------|
| a. Write in a journal what you ate and how much physical activity you did?                            | <input type="checkbox"/> | <input type="checkbox"/> | <input type="checkbox"/> | <input type="checkbox"/> |
| b. Work toward goals you set for yourself /your family to eat healthy foods and be physically active? | <input type="checkbox"/> | <input type="checkbox"/> | <input type="checkbox"/> | <input type="checkbox"/> |
| c. Plan healthy meals for the week ahead, including making a shopping list?                           | <input type="checkbox"/> | <input type="checkbox"/> | <input type="checkbox"/> | <input type="checkbox"/> |
| d. Shop for healthy foods and beverages for your family?                                              | <input type="checkbox"/> | <input type="checkbox"/> | <input type="checkbox"/> | <input type="checkbox"/> |
| e. Ensure that healthy foods were prepared for your family?                                           | <input type="checkbox"/> | <input type="checkbox"/> | <input type="checkbox"/> | <input type="checkbox"/> |
| f. Ensure that your family ate healthy breakfasts?                                                    | <input type="checkbox"/> | <input type="checkbox"/> | <input type="checkbox"/> | <input type="checkbox"/> |
| g. Eat dinner together with family members?                                                           | <input type="checkbox"/> | <input type="checkbox"/> | <input type="checkbox"/> | <input type="checkbox"/> |
| h. Exercise for a total of 30 minutes?                                                                | <input type="checkbox"/> | <input type="checkbox"/> | <input type="checkbox"/> | <input type="checkbox"/> |
| i. Exercise with your children?                                                                       | <input type="checkbox"/> | <input type="checkbox"/> | <input type="checkbox"/> | <input type="checkbox"/> |
| j. Ensure that your children exercised for one hour?                                                  | <input type="checkbox"/> | <input type="checkbox"/> | <input type="checkbox"/> | <input type="checkbox"/> |
| k. Encourage your children to be active instead of watching TV and/or sitting at the computer?        | <input type="checkbox"/> | <input type="checkbox"/> | <input type="checkbox"/> | <input type="checkbox"/> |

| <b>19. Thinking about what you eat on an AVERAGE DAY, how many times do you eat or drink...</b> | <b>0 Times</b>           | <b>1 Time</b>            | <b>2 Times</b>           | <b>3 Times</b>           | <b>4 Times</b>           | <b>5+ Times</b>          |
|-------------------------------------------------------------------------------------------------|--------------------------|--------------------------|--------------------------|--------------------------|--------------------------|--------------------------|
| a. Dairy foods like milk, yogurt, cheese, and fortified soy beverages?                          | <input type="checkbox"/> |
| b. Soda or pop?                                                                                 | <input type="checkbox"/> |
| c. Fruits (including 100% fruit juice)?                                                         | <input type="checkbox"/> |
| d. Protein foods like meats, poultry, seafood, beans, and tofu?                                 | <input type="checkbox"/> |
| e. Chips or French fries?                                                                       | <input type="checkbox"/> |
| f. Vegetables                                                                                   | <input type="checkbox"/> |
| g. Candy, cookies, cake, or other sweets?                                                       | <input type="checkbox"/> |
| h. Grains like oatmeal, bread, and rice?                                                        | <input type="checkbox"/> |

**About You**

|                                                                                                                                                                                                                                                                                                                                                                                                   |                                                |
|---------------------------------------------------------------------------------------------------------------------------------------------------------------------------------------------------------------------------------------------------------------------------------------------------------------------------------------------------------------------------------------------------|------------------------------------------------|
| <b>20. What is your gender?</b> <input type="checkbox"/> Male <input type="checkbox"/> Female                                                                                                                                                                                                                                                                                                     |                                                |
| <b>21. How old are you?</b> <input type="checkbox"/> 18 – 21 <input type="checkbox"/> 22 - 30 <input type="checkbox"/> 31 - 40 <input type="checkbox"/> 41 – 50 <input type="checkbox"/> 51 - 60 <input type="checkbox"/> 60+                                                                                                                                                                     |                                                |
| <b>22. Are you Hispanic or Latino?</b> <input type="checkbox"/> No <input type="checkbox"/> Yes                                                                                                                                                                                                                                                                                                   |                                                |
| <b>23. What is your race?(Choose one or more.)</b><br><input type="checkbox"/> Black/African American <input type="checkbox"/> American Indian or Alaska Native <input type="checkbox"/> Asian<br><input type="checkbox"/> White <input type="checkbox"/> Native Hawaiian or other Pacific Islander                                                                                               |                                                |
| <b>24. What is the highest level of education you have completed?</b><br><input type="checkbox"/> Elementary school (grades 1-8) <input type="checkbox"/> Associate degree (2-year)<br><input type="checkbox"/> Some high school (grades 9-11) <input type="checkbox"/> College degree (4-year)<br><input type="checkbox"/> High school degree or GED <input type="checkbox"/> Graduate degree    |                                                |
| <b>25. Please check the category that represents your annual household income.</b><br><input type="checkbox"/> Less than \$15,000 <input type="checkbox"/> \$35,000-\$49,999 <input type="checkbox"/> \$75,000-\$99,999 <input type="checkbox"/> \$150,000+<br><input type="checkbox"/> \$15,000-\$34,999 <input type="checkbox"/> \$50,000-\$74,999 <input type="checkbox"/> \$100,000-\$149,000 |                                                |
| <b>26. Number of children:</b> <input type="checkbox"/> None <input type="checkbox"/> 1 <input type="checkbox"/> 2 <input type="checkbox"/> 3 <input type="checkbox"/> 4 or more                                                                                                                                                                                                                  |                                                |
| <b>27a. Not including BodyWorks, have you gone to any education programs about healthy eating or physical activity in the past 6 months?</b> <input type="checkbox"/> No <input type="checkbox"/> Yes                                                                                                                                                                                             |                                                |
| <b>27b. If you checked "yes," please describe the program:</b> _____<br>_____                                                                                                                                                                                                                                                                                                                     |                                                |
| <b>28. How would you describe your eating habits?</b><br><input type="checkbox"/> Not at all healthy <input type="checkbox"/> Not very healthy <input type="checkbox"/> Mostly healthy <input type="checkbox"/> Very healthy                                                                                                                                                                      |                                                |
| <b>29. How would you describe your exercise habits?</b><br><input type="checkbox"/> Not at all healthy <input type="checkbox"/> Not very healthy <input type="checkbox"/> Mostly healthy <input type="checkbox"/> Very healthy                                                                                                                                                                    |                                                |
| <b>30. How tall are you?</b> _____ Feet and inches                                                                                                                                                                                                                                                                                                                                                | <b>31. How much do you weigh?</b> _____ Pounds |



The following questions are about the child/children that came with you to BodyWorks. If only one child attended BodyWorks with you, please only complete the section labeled "Child #1."

Child #1:  Girl  Boy

|                                                                                                                                                                                                                                                                                                                                              |                                                                                                                                                                                                                                                                                                                                                                                     |
|----------------------------------------------------------------------------------------------------------------------------------------------------------------------------------------------------------------------------------------------------------------------------------------------------------------------------------------------|-------------------------------------------------------------------------------------------------------------------------------------------------------------------------------------------------------------------------------------------------------------------------------------------------------------------------------------------------------------------------------------|
| <b>32. What is your relationship to the child who is participating in the BodyWorks program with you?</b><br><input type="checkbox"/> Mother or stepmother <input type="checkbox"/> Father or stepfather <input type="checkbox"/> Grandmother or aunt<br><input type="checkbox"/> Grandfather or uncle <input type="checkbox"/> Other: _____ |                                                                                                                                                                                                                                                                                                                                                                                     |
| <b>33. On average, how many days does your child live with you during the week?</b><br><input type="checkbox"/> Less than 1 day <input type="checkbox"/> 1 day <input type="checkbox"/> 2 days <input type="checkbox"/> 3-4 days <input type="checkbox"/> 5-6 days <input type="checkbox"/> 7 days                                           |                                                                                                                                                                                                                                                                                                                                                                                     |
| <b>34. How old is your child?</b><br><input type="checkbox"/> 9 or less <input type="checkbox"/> 10 <input type="checkbox"/> 11<br><input type="checkbox"/> 12 <input type="checkbox"/> 13 <input type="checkbox"/> 14+                                                                                                                      | <b>35. What grade is your child in?</b><br><input type="checkbox"/> 4 <sup>th</sup> <input type="checkbox"/> 5 <sup>th</sup> <input type="checkbox"/> 6 <sup>th</sup> <input type="checkbox"/> 7 <sup>th</sup><br><input type="checkbox"/> 8 <sup>th</sup> <input type="checkbox"/> 9 <sup>th</sup> <input type="checkbox"/> 10 <sup>th</sup> <input type="checkbox"/> Other: _____ |
| <b>36. How tall is your child?</b><br>_____<br>Feet and inches                                                                                                                                                                                                                                                                               | <b>37. How much does your child weigh?</b><br>_____<br>Pounds                                                                                                                                                                                                                                                                                                                       |

Child #2 (if applicable)  Girl  Boy

|                                                                                                                                                                                                                                                                                                                                              |                                                                                                                                                                                                                                                                                                                                                                                     |
|----------------------------------------------------------------------------------------------------------------------------------------------------------------------------------------------------------------------------------------------------------------------------------------------------------------------------------------------|-------------------------------------------------------------------------------------------------------------------------------------------------------------------------------------------------------------------------------------------------------------------------------------------------------------------------------------------------------------------------------------|
| <b>38. What is your relationship to the child who is participating in the BodyWorks program with you?</b><br><input type="checkbox"/> Mother or stepmother <input type="checkbox"/> Father or stepfather <input type="checkbox"/> Grandmother or aunt<br><input type="checkbox"/> Grandfather or uncle <input type="checkbox"/> Other: _____ |                                                                                                                                                                                                                                                                                                                                                                                     |
| <b>39. On average, how many days does your child live with you during the week?</b><br><input type="checkbox"/> Less than 1 day <input type="checkbox"/> 1 day <input type="checkbox"/> 2 days <input type="checkbox"/> 3-4 days <input type="checkbox"/> 5-6 days <input type="checkbox"/> 7 days                                           |                                                                                                                                                                                                                                                                                                                                                                                     |
| <b>40. How old is your child?</b><br><input type="checkbox"/> 9 or less <input type="checkbox"/> 10 <input type="checkbox"/> 11<br><input type="checkbox"/> 12 <input type="checkbox"/> 13 <input type="checkbox"/> 14+                                                                                                                      | <b>41. What grade is your child in?</b><br><input type="checkbox"/> 4 <sup>th</sup> <input type="checkbox"/> 5 <sup>th</sup> <input type="checkbox"/> 6 <sup>th</sup> <input type="checkbox"/> 7 <sup>th</sup><br><input type="checkbox"/> 8 <sup>th</sup> <input type="checkbox"/> 9 <sup>th</sup> <input type="checkbox"/> 10 <sup>th</sup> <input type="checkbox"/> Other: _____ |
| <b>42. How tall is your child?</b><br>_____<br>Feet and inches                                                                                                                                                                                                                                                                               | <b>43. How much does your child weigh?</b><br>_____<br>Pounds                                                                                                                                                                                                                                                                                                                       |

Child #3 (if applicable)  Girl  Boy

|                                                                                                                                                                                                                                                                                                                                              |                                                                                                                                                                                                                                                                                                                                                                                     |
|----------------------------------------------------------------------------------------------------------------------------------------------------------------------------------------------------------------------------------------------------------------------------------------------------------------------------------------------|-------------------------------------------------------------------------------------------------------------------------------------------------------------------------------------------------------------------------------------------------------------------------------------------------------------------------------------------------------------------------------------|
| <b>44. What is your relationship to the child who is participating in the BodyWorks program with you?</b><br><input type="checkbox"/> Mother or stepmother <input type="checkbox"/> Father or stepfather <input type="checkbox"/> Grandmother or aunt<br><input type="checkbox"/> Grandfather or uncle <input type="checkbox"/> Other: _____ |                                                                                                                                                                                                                                                                                                                                                                                     |
| <b>45. On average, how many days does your child live with you during the week?</b><br><input type="checkbox"/> Less than 1 day <input type="checkbox"/> 1 day <input type="checkbox"/> 2 days <input type="checkbox"/> 3-4 days <input type="checkbox"/> 5-6 days <input type="checkbox"/> 7 days                                           |                                                                                                                                                                                                                                                                                                                                                                                     |
| <b>46. How old is your child?</b><br><input type="checkbox"/> 9 or less <input type="checkbox"/> 10 <input type="checkbox"/> 11<br><input type="checkbox"/> 12 <input type="checkbox"/> 13 <input type="checkbox"/> 14+                                                                                                                      | <b>47. What grade is your child in?</b><br><input type="checkbox"/> 4 <sup>th</sup> <input type="checkbox"/> 5 <sup>th</sup> <input type="checkbox"/> 6 <sup>th</sup> <input type="checkbox"/> 7 <sup>th</sup><br><input type="checkbox"/> 8 <sup>th</sup> <input type="checkbox"/> 9 <sup>th</sup> <input type="checkbox"/> 10 <sup>th</sup> <input type="checkbox"/> Other: _____ |
| <b>48. How tall is your child?</b><br>_____<br>Feet and inches                                                                                                                                                                                                                                                                               | <b>49. How much does your child weigh?</b><br>_____<br>Pounds                                                                                                                                                                                                                                                                                                                       |

**Appendix C: Outcome Evaluation Instruments -  
Parent/Caregiver Exit Survey**

Form Approved OMB No. 0990-0385  
Exp. Date: 12/31/2014

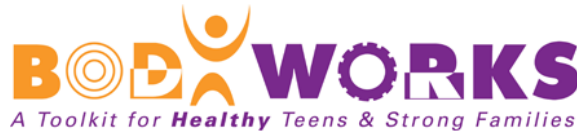

**Parent/Caregiver Exit Survey**

The Office on Women’s Health is trying to find out how well the BodyWorks program helps you, your child, and the rest of your family. You will help improve the program by taking this survey.

This survey will take you about 20 minutes to complete. It includes questions about the *BodyWorks* program, your eating and physical activity habits, and about your children. When the survey asks you about “your children,” please think of the children who will be participating in *BodyWorks* as you answer. Unless the directions say otherwise, please choose one response for each question. Your survey answers are private.

|                                                                                                |               |              |
|------------------------------------------------------------------------------------------------|---------------|--------------|
| Please write down <b>YOUR first and last initials:</b>                                         |               |              |
| _____                                                                                          | _____         | _____        |
| [Example: <u>J</u> ane <u>S</u> mith is J.S.; <u>J</u> ane <u>D</u> oe- <u>S</u> mith is J.S.] | First Initial | Last Initial |

|                                                                                                                                                                                            |                                                          |                                                          |
|--------------------------------------------------------------------------------------------------------------------------------------------------------------------------------------------|----------------------------------------------------------|----------------------------------------------------------|
| Please write down the <b>MONTH and YEAR of BIRTH of the children</b> participating in the BodyWorks Program with you.<br>[Example: Write 05/95 if your child’s birthday is in May of 1995] |                                                          |                                                          |
| CHILD #1:<br>_____ / _____<br>MM      YY                                                                                                                                                   | CHILD #2 (IF APPLICABLE):<br>_____ / _____<br>MM      YY | CHILD #3 (IF APPLICABLE):<br>_____ / _____<br>MM      YY |

|                                                                                                                                                                                                                                                                                                                                                                                                                                                                                                                                                                              |
|------------------------------------------------------------------------------------------------------------------------------------------------------------------------------------------------------------------------------------------------------------------------------------------------------------------------------------------------------------------------------------------------------------------------------------------------------------------------------------------------------------------------------------------------------------------------------|
| <p><b>1. Right now, how do you feel about making changes to your <u>eating habits</u>?</b></p> <p><input type="checkbox"/> I have not thought about making any changes.</p> <p><input type="checkbox"/> I plan to make changes later, maybe in 6 months.</p> <p><input type="checkbox"/> I want to make changes soon, maybe in the next month.</p> <p><input type="checkbox"/> I am making changes right now, but this has been for less than 6 months.</p> <p><input type="checkbox"/> I have made changes and have kept up with them for 6 months or longer.</p>           |
| <p><b>2. How much do you want to make changes to your <u>eating habits</u>?</b></p> <p><input type="checkbox"/> Not at all</p> <p><input type="checkbox"/> Very little</p> <p><input type="checkbox"/> Some</p> <p><input type="checkbox"/> A lot</p>                                                                                                                                                                                                                                                                                                                        |
| <p><b>3. Right now, how do you feel about making changes to your <u>exercise habits</u>?</b></p> <p><input type="checkbox"/> I have not thought about making any changes.</p> <p><input type="checkbox"/> I plan to make changes in the future, maybe in 6 months.</p> <p><input type="checkbox"/> I want to make changes soon, maybe in the next month.</p> <p><input type="checkbox"/> I am making changes right now, but this has been for less than 6 months.</p> <p><input type="checkbox"/> I have made changes and have kept up with them for 6 months or longer.</p> |
| <p><b>4. How much do you want to make changes to your <u>exercise habits</u>?</b></p> <p><input type="checkbox"/> Not at all</p> <p><input type="checkbox"/> Very little</p> <p><input type="checkbox"/> Some</p> <p><input type="checkbox"/> A lot</p>                                                                                                                                                                                                                                                                                                                      |

According to the Paperwork Reduction Act of 1995, no persons are required to respond to a collection of information unless it displays a valid OMB control number. The valid OMB control number for this information collection is 0990-0385. The time required to complete this information collection is estimated to average 20 minutes per response, including the time to review instructions, search existing data resources, gather the data needed, and complete and review the information collection. If you have comments concerning the accuracy of the time estimate(s) or suggestions for improving this form, please write to: U.S. Department of Health & Human Services, OS/OCIO/PRA, 200 Independence Ave., S.W., Suite 537-H, Washington D.C. 20201, Attention: PRA Reports Clearance Officer

| 5a. How important to YOU is...                                                                                                                       | Not At All Important     | Not Very Important       | Important                | Very Important           |
|------------------------------------------------------------------------------------------------------------------------------------------------------|--------------------------|--------------------------|--------------------------|--------------------------|
| a. Eating a healthy mix of foods like fruits, vegetables, whole grains, low-fat or fat-free dairy foods, and protein foods?                          | <input type="checkbox"/> | <input type="checkbox"/> | <input type="checkbox"/> | <input type="checkbox"/> |
| b. Exercising moderately for a total of 2.5 hours per week                                                                                           | <input type="checkbox"/> | <input type="checkbox"/> | <input type="checkbox"/> | <input type="checkbox"/> |
| c. Setting goals to improve your eating and physical activity habits?                                                                                | <input type="checkbox"/> | <input type="checkbox"/> | <input type="checkbox"/> | <input type="checkbox"/> |
| d. Writing in a journal about your eating and physical activity habits?                                                                              | <input type="checkbox"/> | <input type="checkbox"/> | <input type="checkbox"/> | <input type="checkbox"/> |
| e. Planning, shopping for, or making healthy foods for your family?                                                                                  | <input type="checkbox"/> | <input type="checkbox"/> | <input type="checkbox"/> | <input type="checkbox"/> |
| f. Preventing diseases that happen later in life, like heart disease, diabetes, and osteoporosis (a disease that causes bones to break more easily)? | <input type="checkbox"/> | <input type="checkbox"/> | <input type="checkbox"/> | <input type="checkbox"/> |

**Question 5b is about the children that came with you to BodyWorks**

| 5b. How important is it to you that YOUR children are...                                                                    | Not At All Important     | Not Very Important       | Important                | Very Important           |
|-----------------------------------------------------------------------------------------------------------------------------|--------------------------|--------------------------|--------------------------|--------------------------|
| a. Eating a healthy mix of foods like fruits, vegetables, whole grains, low-fat or fat-free dairy foods, and protein foods? | <input type="checkbox"/> | <input type="checkbox"/> | <input type="checkbox"/> | <input type="checkbox"/> |
| b. Exercising for one hour every day?                                                                                       | <input type="checkbox"/> | <input type="checkbox"/> | <input type="checkbox"/> | <input type="checkbox"/> |
| c. Setting goals to improve their eating and physical activity habits?                                                      | <input type="checkbox"/> | <input type="checkbox"/> | <input type="checkbox"/> | <input type="checkbox"/> |
| d. Writing in a journal about their eating and physical activity habits?                                                    | <input type="checkbox"/> | <input type="checkbox"/> | <input type="checkbox"/> | <input type="checkbox"/> |
| e. Helping you plan, shop for, or make healthy foods?                                                                       | <input type="checkbox"/> | <input type="checkbox"/> | <input type="checkbox"/> | <input type="checkbox"/> |
| f. Preventing diseases later in life, like heart disease, diabetes, and osteoporosis                                        | <input type="checkbox"/> | <input type="checkbox"/> | <input type="checkbox"/> | <input type="checkbox"/> |

| 6a. Do you think you can ...                                                                      | No, Not At All           | No, Not Really           | Yes, A Little            | Yes, Definitely          |
|---------------------------------------------------------------------------------------------------|--------------------------|--------------------------|--------------------------|--------------------------|
| a. Talk with your family about how you can all eat healthier foods or get more physical activity? | <input type="checkbox"/> | <input type="checkbox"/> | <input type="checkbox"/> | <input type="checkbox"/> |
| b. Provide healthy meals each week (includes planning, shopping, or food preparation)?            | <input type="checkbox"/> | <input type="checkbox"/> | <input type="checkbox"/> | <input type="checkbox"/> |
| c. Use nutrition facts labels on packages to pick healthy foods?                                  | <input type="checkbox"/> | <input type="checkbox"/> | <input type="checkbox"/> | <input type="checkbox"/> |
| d. Choose healthy foods and drinks at home?                                                       | <input type="checkbox"/> | <input type="checkbox"/> | <input type="checkbox"/> | <input type="checkbox"/> |
| e. Choose healthy foods and drinks at restaurants, including fast food restaurants?               | <input type="checkbox"/> | <input type="checkbox"/> | <input type="checkbox"/> | <input type="checkbox"/> |
| f. Plan what physical activities you will do for the week?                                        | <input type="checkbox"/> | <input type="checkbox"/> | <input type="checkbox"/> | <input type="checkbox"/> |
| g. Exercise moderately for a total of 2.5 hours per week                                          | <input type="checkbox"/> | <input type="checkbox"/> | <input type="checkbox"/> | <input type="checkbox"/> |
| h. Exercise even if there are barriers, like if you are too tired or very busy?                   | <input type="checkbox"/> | <input type="checkbox"/> | <input type="checkbox"/> | <input type="checkbox"/> |

**Question 6b is about the children that came with you to BodyWorks**

| <b>6b. Do you think you can help your children to...</b>                                                                                 | <b>No, Not At All</b>    | <b>No, Not Really</b>    | <b>Yes, A Little</b>     | <b>Yes, definitely</b>   |
|------------------------------------------------------------------------------------------------------------------------------------------|--------------------------|--------------------------|--------------------------|--------------------------|
| a. Assist you in providing healthy meals each week (includes planning, shopping, or preparing food)?                                     | <input type="checkbox"/> | <input type="checkbox"/> | <input type="checkbox"/> | <input type="checkbox"/> |
| b. Choose healthier foods and drinks, including foods with calcium and vitamin D?                                                        | <input type="checkbox"/> | <input type="checkbox"/> | <input type="checkbox"/> | <input type="checkbox"/> |
| c. Choose healthier foods and drinks at restaurants, including fast food restaurants?                                                    | <input type="checkbox"/> | <input type="checkbox"/> | <input type="checkbox"/> | <input type="checkbox"/> |
| d. Limit computer and TV time so your children can spend more time being active?                                                         | <input type="checkbox"/> | <input type="checkbox"/> | <input type="checkbox"/> | <input type="checkbox"/> |
| e. Exercise for 60 minutes each day, including bone strengthening activities like running, jumping rope, or other high-impact activities | <input type="checkbox"/> | <input type="checkbox"/> | <input type="checkbox"/> | <input type="checkbox"/> |

**7. The most important time in life for building strong bones is when you are a/an...**

Baby or young child (ages 0-8)  
 Preteen or teen (ages 9-18)  
 Young adult (ages 19-29)  
 Adult (ages 30 to 54)  
 Older adult (age 55+)  
 Don't know

**8. The amount of a food that you choose to eat for a meal or a snack is a...**

Serving                       Plate                       Portion Size                       Don't know

**9. A measured amount of food or drink that you can find on a nutrition facts label is the...**

Recipe                       Portion Size                       Serving                       Don't know

**10. The dangers of having an unhealthy diet can be: (Choose one or more.)**

Not getting enough nutrients to grow and develop  
 Higher risk for diseases like osteoporosis or diabetes  
 Higher risk for being overweight  
 Don't know

**11. Which foods contain calcium? (Choose one or more.)**

Milk                       Fortified orange juice                       Peaches                       Water                       Don't know

**12. Which foods contain vitamin D? (Choose one or more.)**

Salmon                       Chicken                       Fortified Milk                       Spinach                       Don't know

**13. Which sandwich has less fat?**

Fried chicken sandwich                       Grilled chicken sandwich                       They both have the same amount of fat                       Don't know

**14. How can physical activity help you? (Choose one or more.)**

Helps you control your weight                       Lowers your chance of getting high blood pressure                       Helps you feel less stressed                       Decreases your vitamin C levels                       Don't know

**15. To strengthen your bones you should:**

Swim 3 times a week                       Do stretching exercises, like touching your toes                       Do activities like jumping and dancing                       Don't know

| <b>16. Tell us about the <u>past 7 days</u>. On how many days did you...</b>                          | <b>0 Days</b>            | <b>1-2 Day</b>           | <b>3-4 Days</b>          | <b>5-7 Days</b>          |
|-------------------------------------------------------------------------------------------------------|--------------------------|--------------------------|--------------------------|--------------------------|
| a. Write in a journal what you ate and how much physical activity you did?                            | <input type="checkbox"/> | <input type="checkbox"/> | <input type="checkbox"/> | <input type="checkbox"/> |
| b. Work toward goals you set for yourself /your family to eat healthy foods and be physically active? | <input type="checkbox"/> | <input type="checkbox"/> | <input type="checkbox"/> | <input type="checkbox"/> |
| c. Plan healthy meals for the week ahead, including making a shopping list?                           | <input type="checkbox"/> | <input type="checkbox"/> | <input type="checkbox"/> | <input type="checkbox"/> |
| d. Shop for healthy foods and beverages for your family?                                              | <input type="checkbox"/> | <input type="checkbox"/> | <input type="checkbox"/> | <input type="checkbox"/> |
| e. Ensure that healthy foods were prepared for your family?                                           | <input type="checkbox"/> | <input type="checkbox"/> | <input type="checkbox"/> | <input type="checkbox"/> |
| f. Ensure that your family ate healthy breakfasts?                                                    | <input type="checkbox"/> | <input type="checkbox"/> | <input type="checkbox"/> | <input type="checkbox"/> |
| g. Eat dinner together with family members?                                                           | <input type="checkbox"/> | <input type="checkbox"/> | <input type="checkbox"/> | <input type="checkbox"/> |
| h. Exercise for a total of 30 minutes?                                                                | <input type="checkbox"/> | <input type="checkbox"/> | <input type="checkbox"/> | <input type="checkbox"/> |
| i. Exercise with your children?                                                                       | <input type="checkbox"/> | <input type="checkbox"/> | <input type="checkbox"/> | <input type="checkbox"/> |
| j. Ensure that your children exercised for one hour?                                                  | <input type="checkbox"/> | <input type="checkbox"/> | <input type="checkbox"/> | <input type="checkbox"/> |
| k. Encourage your children to be active instead of watching TV and/or sitting at the computer?        | <input type="checkbox"/> | <input type="checkbox"/> | <input type="checkbox"/> | <input type="checkbox"/> |

| <b>17. Thinking about what you eat on an AVERAGE DAY, how many times do you eat or drink...</b> | <b>0 Times</b>           | <b>1 Time</b>            | <b>2 Times</b>           | <b>3 Times</b>           | <b>4 Times</b>           | <b>5+ Times</b>          |
|-------------------------------------------------------------------------------------------------|--------------------------|--------------------------|--------------------------|--------------------------|--------------------------|--------------------------|
| a. Dairy foods like milk, yogurt, cheese, and fortified soy beverages?                          | <input type="checkbox"/> |
| b. Soda or pop?                                                                                 | <input type="checkbox"/> |
| c. Fruits (including 100% fruit juice)?                                                         | <input type="checkbox"/> |
| d. Protein foods like meats, poultry, seafood, beans, and tofu?                                 | <input type="checkbox"/> |
| e. Chips or French fries?                                                                       | <input type="checkbox"/> |
| f. Vegetables?                                                                                  | <input type="checkbox"/> |
| g. Candy, cookies, cake, or other sweets?                                                       | <input type="checkbox"/> |
| h. Grains like bread, oatmeal, and rice?                                                        | <input type="checkbox"/> |

This section asks about your experience with the BodyWorks program.

**18. How many sessions did you attend? (Circle one.)**  
 1      2      3      4      5      6      7      8      More than 8

**19. If you missed one or more sessions, what were the reasons? (Choose one or more.)**

I was busy with something else, like responsibilities at school, work, or home  
 I was sick  
 I did not have a way to get there  
 I did not like the group members  
 I did not finish the BodyWorks homework  
 I never missed a session  
 Other: \_\_\_\_\_

**20a. Below is a list of activities that trainers might have done to encourage people to keep coming to BodyWorks. If your trainer did these things, please check how much they encouraged you to keep coming to BodyWorks. If your trainer did NOT do this, please check "My trainer did NOT do this."**

| How encouraging was it when your trainer...                                 | Not At All Encouraging   | Not Really Encouraging   | A Little Encouraging     | Very Encouraging         | My trainer DID NOT do this. |
|-----------------------------------------------------------------------------|--------------------------|--------------------------|--------------------------|--------------------------|-----------------------------|
| a. Contacted you before a session to remind you to attend?                  | <input type="checkbox"/>    |
| b. Contacted you when you missed a session?                                 | <input type="checkbox"/>    |
| c. Gave you prizes such as coupons, gift cards, water bottles, or t-shirts? | <input type="checkbox"/>    |
| d. Paid for you or your family to get a ride to BodyWorks?                  | <input type="checkbox"/>    |
| e. Provided babysitting while you attended BodyWorks sessions?              | <input type="checkbox"/>    |
| f. Other (please specify):                                                  | <input type="checkbox"/>    |

**20b. If your trainer gave you prizes to participate in BodyWorks, please describe the prizes you received:**

\_\_\_\_\_

\_\_\_\_\_

**21. Tell us how helpful the BodyWorks toolkit items were to you. If you did NOT use a particular toolkit item, please check "I did NOT use this toolkit item."**

| How HELPFUL were the following BodyWorks Toolkit Items? | Not At All Helpful       | A Little Helpful         | Helpful                  | Very Helpful             | I did NOT use this toolkit item. |
|---------------------------------------------------------|--------------------------|--------------------------|--------------------------|--------------------------|----------------------------------|
| a. Body Basics                                          | <input type="checkbox"/>         |
| b. BodyWorks For Teens                                  | <input type="checkbox"/>         |
| c. BodyWorks for Guys                                   | <input type="checkbox"/>         |
| d. Best Journal Ever!                                   | <input type="checkbox"/>         |
| e. Deliciously Healthy Family Meals Cookbook            | <input type="checkbox"/>         |
| f. Let's Shop, Cook, and Eat Together DVD               | <input type="checkbox"/>         |
| g. Shopping Lists                                       | <input type="checkbox"/>         |
| h. Weekly Planner refrigerator magnet                   | <input type="checkbox"/>         |

**22. Outside of the BodyWorks sessions, how often did you use any of the toolkit items with your children?**

Never  
 Rarely  
 Sometimes  
 Often

**23. If parts of the BodyWorks Toolkit were *not* helpful, what could make them better?**

\_\_\_\_\_

\_\_\_\_\_

| 24. My BodyWorks Trainer(s)...              | Strongly Disagree        | Disagree                 | Agree                    | Strongly Agree           |
|---------------------------------------------|--------------------------|--------------------------|--------------------------|--------------------------|
| a. Showed up on time                        | <input type="checkbox"/> | <input type="checkbox"/> | <input type="checkbox"/> | <input type="checkbox"/> |
| b. Was well prepared for each session       | <input type="checkbox"/> | <input type="checkbox"/> | <input type="checkbox"/> | <input type="checkbox"/> |
| c. Knew a lot about the topics we discussed | <input type="checkbox"/> | <input type="checkbox"/> | <input type="checkbox"/> | <input type="checkbox"/> |
| d. Made me feel comfortable in the group    | <input type="checkbox"/> | <input type="checkbox"/> | <input type="checkbox"/> | <input type="checkbox"/> |
| e. Treated me with respect                  | <input type="checkbox"/> | <input type="checkbox"/> | <input type="checkbox"/> | <input type="checkbox"/> |
| f. Connected well with the group            | <input type="checkbox"/> | <input type="checkbox"/> | <input type="checkbox"/> | <input type="checkbox"/> |
| g. Included everyone in activities          | <input type="checkbox"/> | <input type="checkbox"/> | <input type="checkbox"/> | <input type="checkbox"/> |

| 25. Think about the BodyWorks program. How much did you like... | Did not like at all      | Liked a little           | Liked                    | Liked a lot              |
|-----------------------------------------------------------------|--------------------------|--------------------------|--------------------------|--------------------------|
| a. <u>Where</u> the BodyWorks sessions were held?               | <input type="checkbox"/> | <input type="checkbox"/> | <input type="checkbox"/> | <input type="checkbox"/> |
| b. <u>When</u> the BodyWorks sessions were held?                | <input type="checkbox"/> | <input type="checkbox"/> | <input type="checkbox"/> | <input type="checkbox"/> |
| c. <u>How long</u> each of the BodyWorks sessions lasted?       | <input type="checkbox"/> | <input type="checkbox"/> | <input type="checkbox"/> | <input type="checkbox"/> |
| d. The number of sessions for parents?                          | <input type="checkbox"/> | <input type="checkbox"/> | <input type="checkbox"/> | <input type="checkbox"/> |
| e. The number of sessions for children?                         | <input type="checkbox"/> | <input type="checkbox"/> | <input type="checkbox"/> | <input type="checkbox"/> |

| 26. How much did you like the: | Did not like at all      | Liked a little           | Liked                    | Liked a lot              |
|--------------------------------|--------------------------|--------------------------|--------------------------|--------------------------|
| a. Session topics              | <input type="checkbox"/> | <input type="checkbox"/> | <input type="checkbox"/> | <input type="checkbox"/> |
| b. Activities/Demonstrations   | <input type="checkbox"/> | <input type="checkbox"/> | <input type="checkbox"/> | <input type="checkbox"/> |
| c. Snacks                      | <input type="checkbox"/> | <input type="checkbox"/> | <input type="checkbox"/> | <input type="checkbox"/> |
| d. Physical Activities         | <input type="checkbox"/> | <input type="checkbox"/> | <input type="checkbox"/> | <input type="checkbox"/> |
| e. BodyWorks program overall   | <input type="checkbox"/> | <input type="checkbox"/> | <input type="checkbox"/> | <input type="checkbox"/> |

**27. What would make the BodyWorks program better? (Write your answer in the space below.)**

\_\_\_\_\_

\_\_\_\_\_

**28a. Not including Bodyworks, did you go to any education programs about healthy eating or physical activity in the past 8 weeks?**  No  Yes

**28b. If you checked "yes," please describe the program:**

\_\_\_\_\_

\_\_\_\_\_

**Appendix C: Outcome Evaluation Instruments -  
Parent/Caregiver Follow-Up Survey**

Form Approved OMB No. 0990-0385  
Exp. Date: 12/31/2014

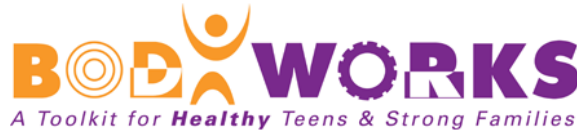

**Parent/Caregiver Follow-up Survey**

The Office on Women’s Health is trying to find out how well the BodyWorks program helps you, your child, and the rest of your family. You will help improve the program by taking this survey.

This survey will take you about 20 minutes to complete. It includes questions about the *BodyWorks* program, your eating and physical activity habits, and about your children. When the survey asks you about “your children,” please think of the children who will be participating in *BodyWorks* as you answer. Unless the directions say otherwise, please choose one response for each question. Your survey answers are private.

|                                                                                                                                                               |                        |                       |
|---------------------------------------------------------------------------------------------------------------------------------------------------------------|------------------------|-----------------------|
| Please write down <b>YOUR first and last initials</b> :<br><br>[Example: <u>J</u> ane <u>S</u> mith is J.S.; <u>J</u> ane <u>D</u> oe- <u>S</u> mith is J.S.] | _____<br>First Initial | _____<br>Last Initial |
|---------------------------------------------------------------------------------------------------------------------------------------------------------------|------------------------|-----------------------|

|                                                                                                                                                                                            |                                                              |                                                              |
|--------------------------------------------------------------------------------------------------------------------------------------------------------------------------------------------|--------------------------------------------------------------|--------------------------------------------------------------|
| Please write down the <b>MONTH and YEAR of BIRTH of the children</b> participating in the BodyWorks Program with you.<br>[Example: Write 05/95 if your child’s birthday is in May of 1995] |                                                              |                                                              |
| CHILD #1:<br><br>_____ / _____<br>MM      YY                                                                                                                                               | CHILD #2 (IF APPLICABLE):<br><br>_____ / _____<br>MM      YY | CHILD #3 (IF APPLICABLE):<br><br>_____ / _____<br>MM      YY |

|                                                                                                                                                                                                                                                                                                                                                                                                                                                                                                                                                                             |
|-----------------------------------------------------------------------------------------------------------------------------------------------------------------------------------------------------------------------------------------------------------------------------------------------------------------------------------------------------------------------------------------------------------------------------------------------------------------------------------------------------------------------------------------------------------------------------|
| <p><b>1. Right now, how do you feel about making changes to your <u>eating habits</u>?</b></p> <p><input type="checkbox"/> I have not thought about making any changes.</p> <p><input type="checkbox"/> I plan to make changes later, maybe in 6 months.</p> <p><input type="checkbox"/> I want to make changes soon, maybe in the next month.</p> <p><input type="checkbox"/> I am making changes right now, but this has been for less than 6 months.</p> <p><input type="checkbox"/> I have made changes and have kept up with them for 6 months or longer.</p>          |
| <p><b>2. How much do you want to make changes to your <u>eating habits</u>?</b></p> <p><input type="checkbox"/> Not at all</p> <p><input type="checkbox"/> Very little</p> <p><input type="checkbox"/> Some</p> <p><input type="checkbox"/> A lot</p>                                                                                                                                                                                                                                                                                                                       |
| <p><b>3. Right now, how do you feel about making changes to your <u>exercise habits</u>?</b></p> <p><input type="checkbox"/> I have not thought about making any changes.</p> <p><input type="checkbox"/> I plan to make changes in the future, maybe in 6 months.</p> <p><input type="checkbox"/> I want to make changes soon, maybe in the next month.</p> <p><input type="checkbox"/> I am making changes right now, but this has been for less than 6 months.</p> <p><input type="checkbox"/> I have made changes and have kept up with them for 6 months or longer</p> |
| <p><b>4. How much do you want to make changes to your <u>exercise habits</u>?</b></p> <p><input type="checkbox"/> Not at all</p> <p><input type="checkbox"/> Very little</p> <p><input type="checkbox"/> Some</p> <p><input type="checkbox"/> A lot</p>                                                                                                                                                                                                                                                                                                                     |

According to the Paperwork Reduction Act of 1995, no persons are required to respond to a collection of information unless it displays a valid OMB control number. The valid OMB control number for this information collection is 0990-0385. The time required to complete this information collection is estimated to average 20 minutes per response, including the time to review instructions, search existing data resources, gather the data needed, and complete and review the information collection. If you have comments concerning the accuracy of the time estimate(s) or suggestions for improving this form, please write to: U.S. Department of Health & Human Services, OS/OCIO/PRA, 200 Independence Ave., S.W., Suite 537-H, Washington D.C. 20201, Attention: PRA Reports Clearance Officer



| 5a. How important to YOU is...                                                                                                                       | Not At All Important     | Not Very Important       | Important                | Very Important           |
|------------------------------------------------------------------------------------------------------------------------------------------------------|--------------------------|--------------------------|--------------------------|--------------------------|
| a. Eating a healthy mix of foods like fruits, vegetables, whole grains, low-fat or fat-free dairy foods, and protein foods?                          | <input type="checkbox"/> | <input type="checkbox"/> | <input type="checkbox"/> | <input type="checkbox"/> |
| b. Exercising moderately for a total of 2.5 hours per week?                                                                                          | <input type="checkbox"/> | <input type="checkbox"/> | <input type="checkbox"/> | <input type="checkbox"/> |
| c. Setting goals to improve your eating and physical activity habits?                                                                                | <input type="checkbox"/> | <input type="checkbox"/> | <input type="checkbox"/> | <input type="checkbox"/> |
| d. Writing in a journal about your eating and physical activity habits?                                                                              | <input type="checkbox"/> | <input type="checkbox"/> | <input type="checkbox"/> | <input type="checkbox"/> |
| e. Planning, shopping for, or making healthy foods for your family?                                                                                  | <input type="checkbox"/> | <input type="checkbox"/> | <input type="checkbox"/> | <input type="checkbox"/> |
| f. Preventing diseases that happen later in life, like heart disease, diabetes, and osteoporosis (a disease that causes bones to break more easily)? | <input type="checkbox"/> | <input type="checkbox"/> | <input type="checkbox"/> | <input type="checkbox"/> |

**Question 5b is about the children that came with you to BodyWorks**

| 5b. How important is it to you that YOUR children are...                                                                    | Not At All Important     | Not Very Important       | Important                | Very Important           |
|-----------------------------------------------------------------------------------------------------------------------------|--------------------------|--------------------------|--------------------------|--------------------------|
| a. Eating a healthy mix of foods like fruits, vegetables, whole grains, low-fat or fat-free dairy foods, and protein foods? | <input type="checkbox"/> | <input type="checkbox"/> | <input type="checkbox"/> | <input type="checkbox"/> |
| b. Exercising for one hour every day?                                                                                       | <input type="checkbox"/> | <input type="checkbox"/> | <input type="checkbox"/> | <input type="checkbox"/> |
| c. Setting goals to improve their eating and physical activity habits?                                                      | <input type="checkbox"/> | <input type="checkbox"/> | <input type="checkbox"/> | <input type="checkbox"/> |
| d. Writing in a journal about their eating and physical activity habits?                                                    | <input type="checkbox"/> | <input type="checkbox"/> | <input type="checkbox"/> | <input type="checkbox"/> |
| e. Helping you plan, shop for, or make healthy foods?                                                                       | <input type="checkbox"/> | <input type="checkbox"/> | <input type="checkbox"/> | <input type="checkbox"/> |
| f. Preventing diseases later in life, like heart disease, diabetes, and osteoporosis?                                       | <input type="checkbox"/> | <input type="checkbox"/> | <input type="checkbox"/> | <input type="checkbox"/> |

| 6a. Do you think you can ...                                                                      | No, Not At All           | No, Not Really           | Yes, A Little            | Yes, Definitely          |
|---------------------------------------------------------------------------------------------------|--------------------------|--------------------------|--------------------------|--------------------------|
| a. Talk with your family about how you can all eat healthier foods or get more physical activity? | <input type="checkbox"/> | <input type="checkbox"/> | <input type="checkbox"/> | <input type="checkbox"/> |
| b. Provide healthy meals each week (includes planning, shopping, or food preparation)?            | <input type="checkbox"/> | <input type="checkbox"/> | <input type="checkbox"/> | <input type="checkbox"/> |
| c. Use nutrition facts labels on packages to pick healthy foods?                                  | <input type="checkbox"/> | <input type="checkbox"/> | <input type="checkbox"/> | <input type="checkbox"/> |
| d. Choose healthy foods and drinks at home?                                                       | <input type="checkbox"/> | <input type="checkbox"/> | <input type="checkbox"/> | <input type="checkbox"/> |
| e. Choose healthy foods and drinks at restaurants, including fast food restaurants?               | <input type="checkbox"/> | <input type="checkbox"/> | <input type="checkbox"/> | <input type="checkbox"/> |
| f. Plan what physical activities you will do for the week?                                        | <input type="checkbox"/> | <input type="checkbox"/> | <input type="checkbox"/> | <input type="checkbox"/> |
| g. Exercise moderately for a total of 2.5 hours per week?                                         | <input type="checkbox"/> | <input type="checkbox"/> | <input type="checkbox"/> | <input type="checkbox"/> |
| h. Exercise even if there are barriers, like if you are too tired or very busy?                   | <input type="checkbox"/> | <input type="checkbox"/> | <input type="checkbox"/> | <input type="checkbox"/> |

**Question 6b is about the children that came with you to BodyWorks**

| <b>6b. Do you think you can help your children to...</b>                                                                                  | <b>No, Not At All</b>    | <b>No, Not Really</b>    | <b>Yes, A Little</b>     | <b>Yes, definitely</b>   |
|-------------------------------------------------------------------------------------------------------------------------------------------|--------------------------|--------------------------|--------------------------|--------------------------|
| a. Assist you in providing healthy meals each week (includes planning, shopping, or preparing food)?                                      | <input type="checkbox"/> | <input type="checkbox"/> | <input type="checkbox"/> | <input type="checkbox"/> |
| b. Choose healthier foods and drinks, including foods with calcium and vitamin D?                                                         | <input type="checkbox"/> | <input type="checkbox"/> | <input type="checkbox"/> | <input type="checkbox"/> |
| c. Choose healthier foods and drinks at restaurants, including fast food restaurants?                                                     | <input type="checkbox"/> | <input type="checkbox"/> | <input type="checkbox"/> | <input type="checkbox"/> |
| d. Limit computer and TV time so your children can spend more time being active?                                                          | <input type="checkbox"/> | <input type="checkbox"/> | <input type="checkbox"/> | <input type="checkbox"/> |
| e. Exercise for 60 minutes each day, including bone strengthening activities like running, jumping rope, or other high-impact activities? | <input type="checkbox"/> | <input type="checkbox"/> | <input type="checkbox"/> | <input type="checkbox"/> |

**7. The most important time in life for building strong bones is when you are a/an...**

Baby or young child (ages 0-8)  
 Preteen or teen (ages 9-18)  
 Young adult (ages 19-29)  
 Adult (ages 30 to 54)  
 Older adult (age 55+)  
 Don't know

**8. The amount of a food that you choose to eat for a meal or a snack is a...**

Serving                       Plate                       Portion Size                       Don't know

**9. A measured amount of food or drink that you can find on a nutrition facts label is the...**

Recipe                       Portion Size                       Serving                       Don't know

**10. The dangers of having an unhealthy diet can be: (Choose one or more.)**

Not getting enough nutrients to grow and develop  
 Higher risk for diseases like osteoporosis or diabetes  
 Higher risk for being overweight  
 Don't know

**11. Which foods contain calcium? (Choose one or more.)**

Milk                       Fortified orange juice                       Peaches                       Water                       Don't know

**12. Which foods contain vitamin D? (Choose one or more.)**

Salmon                       Chicken                       Fortified Milk                       Spinach                       Don't know

**13. Which sandwich has less fat?**

Fried chicken sandwich                       Grilled chicken sandwich                       They both have the same amount of fat                       Don't know

**14. How can physical activity help you? (Choose one or more.)**

Helps you control your weight                       Lowers your chance of getting high blood pressure                       Helps you feel less stressed                       Decreases your vitamin C levels                       Don't know

**15. To strengthen your bones you should:**

Swim 3 times a week                       Do stretching exercises, like touching your toes                       Do activities like jumping and dancing                       Don't know

| <b>16. Tell us about the <u>past 7 days</u>. On how many days did you...</b>                          | <b>0 Days</b>            | <b>1-2 Day</b>           | <b>3-4 Days</b>          | <b>5-7 Days</b>          |
|-------------------------------------------------------------------------------------------------------|--------------------------|--------------------------|--------------------------|--------------------------|
| a. Write in a journal what you ate and how much physical activity you did?                            | <input type="checkbox"/> | <input type="checkbox"/> | <input type="checkbox"/> | <input type="checkbox"/> |
| b. Work toward goals you set for yourself /your family to eat healthy foods and be physically active? | <input type="checkbox"/> | <input type="checkbox"/> | <input type="checkbox"/> | <input type="checkbox"/> |
| c. Plan healthy meals for the week ahead, including making a shopping list?                           | <input type="checkbox"/> | <input type="checkbox"/> | <input type="checkbox"/> | <input type="checkbox"/> |
| d. Shop for healthy foods and beverages for your family?                                              | <input type="checkbox"/> | <input type="checkbox"/> | <input type="checkbox"/> | <input type="checkbox"/> |
| e. Ensure that healthy foods were prepared for your family?                                           | <input type="checkbox"/> | <input type="checkbox"/> | <input type="checkbox"/> | <input type="checkbox"/> |
| f. Ensure that your family ate healthy breakfasts?                                                    | <input type="checkbox"/> | <input type="checkbox"/> | <input type="checkbox"/> | <input type="checkbox"/> |
| g. Eat dinner together with family members?                                                           | <input type="checkbox"/> | <input type="checkbox"/> | <input type="checkbox"/> | <input type="checkbox"/> |
| h. Exercise for a total of 30 minutes?                                                                | <input type="checkbox"/> | <input type="checkbox"/> | <input type="checkbox"/> | <input type="checkbox"/> |
| i. Exercise with your children?                                                                       | <input type="checkbox"/> | <input type="checkbox"/> | <input type="checkbox"/> | <input type="checkbox"/> |
| j. Ensure that your children exercised for one hour?                                                  | <input type="checkbox"/> | <input type="checkbox"/> | <input type="checkbox"/> | <input type="checkbox"/> |
| k. Encourage your children to be active instead of watching TV and/or sitting at the computer?        | <input type="checkbox"/> | <input type="checkbox"/> | <input type="checkbox"/> | <input type="checkbox"/> |

| <b>17. Thinking about what you eat on an AVERAGE DAY, how many times do you eat or drink...</b> | <b>0 Times</b>           | <b>1 Time</b>            | <b>2 Times</b>           | <b>3 Times</b>           | <b>4 Times</b>           | <b>5+ Times</b>          |
|-------------------------------------------------------------------------------------------------|--------------------------|--------------------------|--------------------------|--------------------------|--------------------------|--------------------------|
| a. Dairy foods like milk, yogurt, cheese, and fortified soy beverages?                          | <input type="checkbox"/> |
| b. Soda or pop?                                                                                 | <input type="checkbox"/> |
| c. Fruits (including 100% fruit juice)?                                                         | <input type="checkbox"/> |
| d. Protein foods like meats, poultry, seafood, beans, and tofu?                                 | <input type="checkbox"/> |
| e. Chips or French fries?                                                                       | <input type="checkbox"/> |
| f. Vegetables?                                                                                  | <input type="checkbox"/> |
| g. Candy, cookies, cake, or other sweets?                                                       | <input type="checkbox"/> |
| h. Grains like bread, oatmeal, and rice?                                                        | <input type="checkbox"/> |

**18a. Not including BodyWorks, did you go to any education programs about healthy eating or physical activity in the past 8 weeks?**

No       Yes

**18b. If you checked "yes," please describe the program:**

---

**Appendix C: Outcome Evaluation Instruments -  
Child Entrance Survey**

Form Approved OMB No. 0990-0385  
Exp. Date: 12/31/2014

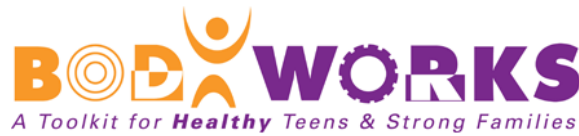

**Child Entrance Survey**

This survey is important. It asks about the *BodyWorks* program, your health and your eating and physical activity habits. By taking this survey, you will help us make *BodyWorks* better. It will take about 20 minutes.

Please read each question before you write your answer. Pick one answer for each question, unless the directions say you can pick more than one. You can skip a question that you do not want to answer. Circle the question number to let us know you skipped it on purpose. **This is NOT a test!** Be as honest as you can. Your answers are private.

Please write the first and last initials of the **parent or caregiver who came with you to this program.**

*[Ex: For Jane Smith, it is J.S. For Jane Doe-Smith, it is J.S.]*

|                         |                         |
|-------------------------|-------------------------|
| _____                   | _____                   |
| Parent's or Caregiver's | Parent's or Caregiver's |
| First Initial           | First Initial           |

What is your **MONTH and YEAR** of BIRTH?

*[Ex: Write 05/95 if your birthday is in May of 1995]*

\_\_\_\_\_/\_\_\_\_\_  
MM                  YY

**If you are a twin**, tell us if you are the older or younger twin

Older twin  
 Younger twin

**1. How did you hear about *BodyWorks*? (Choose one or more.)**

|                                              |                                                                    |                                                     |
|----------------------------------------------|--------------------------------------------------------------------|-----------------------------------------------------|
| <input type="checkbox"/> Parent or caregiver | <input type="checkbox"/> School/Teacher                            | <input type="checkbox"/> Community organization     |
| <input type="checkbox"/> Other family member | <input type="checkbox"/> Doctor or other health care provider      | <input type="checkbox"/> Flyer/Brochure             |
| <input type="checkbox"/> Friend/Neighbor     | <input type="checkbox"/> Church, temple, or other place of worship | <input type="checkbox"/> Newspaper, TV, or radio ad |
| <input type="checkbox"/> Other _____         |                                                                    |                                                     |

---

**2. What made you want to come to the *BodyWorks* program?**

**I wanted to... (Choose one or more.)**

Learn more about healthy eating

Take part in fun physical activities

Improve my health and/or weight

Do an activity with my parent or caregiver

Make new friends

Other: \_\_\_\_\_

According to the Paperwork Reduction Act of 1995, no persons are required to respond to a collection of information unless it displays a valid OMB control number. The valid OMB control number for this information collection is 0990-0385. The time required to complete this information collection is estimated to average 20 minutes per response, including the time to review instructions, search existing data resources, gather the data needed, and complete and review the information collection. If you have comments concerning the accuracy of the time estimate(s) or suggestions for improving this form, please write to: U.S. Department of Health & Human Services, OS/OCIO/PRA, 200 Independence Ave., S.W., Suite 537-H, Washington D.C. 20201, Attention: PRA Reports Clearance Officer

**3. Right now, how do you feel about making changes to your eating habits?**

I have not thought about making any changes.

I plan to make changes later, maybe in 6 months.

I want to make changes soon, maybe in the next month.

I am making changes right now, but this has been for less than 6 months.

I have made changes and have kept up with them for 6 months or longer.

---

**4. How much do you want to make changes to your eating habits?**

Not at all

Very little

Some

A lot

---

**5. Right now, how do you feel about making changes to your exercise habits?**

I have not thought about making any changes.

I plan to make changes in the future, maybe in 6 months.

I want to make changes soon, maybe in the next month.

I am making changes right now, but this has been for less than 6 months.

I have made changes and have kept up with them for 6 months or longer

---

**6. How much do you want to make changes to your exercise habits?**

Not at all

Very little

Some

A lot

| 7a. How important to YOU is...                                                                                              | Not At All Important     | Not Very Important       | Important                | Very Important           |
|-----------------------------------------------------------------------------------------------------------------------------|--------------------------|--------------------------|--------------------------|--------------------------|
| a. Eating a healthy mix of foods like fruits, vegetables, whole grains, low-fat or fat-free dairy foods, and protein foods? | <input type="checkbox"/> | <input type="checkbox"/> | <input type="checkbox"/> | <input type="checkbox"/> |
| b. Exercising for one hour every day?                                                                                       | <input type="checkbox"/> | <input type="checkbox"/> | <input type="checkbox"/> | <input type="checkbox"/> |
| c. Setting goals to improve your eating and physical activity habits?                                                       | <input type="checkbox"/> | <input type="checkbox"/> | <input type="checkbox"/> | <input type="checkbox"/> |
| d. Writing in a journal about your eating and physical activity habits?                                                     | <input type="checkbox"/> | <input type="checkbox"/> | <input type="checkbox"/> | <input type="checkbox"/> |
| e. Helping your parent or caregiver plan, shop for, or make healthy foods?                                                  | <input type="checkbox"/> | <input type="checkbox"/> | <input type="checkbox"/> | <input type="checkbox"/> |
| f. Preventing diseases that happen later in life?                                                                           | <input type="checkbox"/> | <input type="checkbox"/> | <input type="checkbox"/> | <input type="checkbox"/> |

| 7b. How important is it to your PARENT/CAREGIVER that <u>you</u> ...  | Not At All Important     | Not Very Important       | Important                | Very Important           |
|-----------------------------------------------------------------------|--------------------------|--------------------------|--------------------------|--------------------------|
| a. Eat a healthy diet?                                                | <input type="checkbox"/> | <input type="checkbox"/> | <input type="checkbox"/> | <input type="checkbox"/> |
| b. Exercise each day for one hour?                                    | <input type="checkbox"/> | <input type="checkbox"/> | <input type="checkbox"/> | <input type="checkbox"/> |
| c. Set goals to improve your eating and physical activity habits?     | <input type="checkbox"/> | <input type="checkbox"/> | <input type="checkbox"/> | <input type="checkbox"/> |
| d. Write in a journal about your eating and physical activity habits? | <input type="checkbox"/> | <input type="checkbox"/> | <input type="checkbox"/> | <input type="checkbox"/> |
| e. Help plan, shop for, or make healthy foods?                        | <input type="checkbox"/> | <input type="checkbox"/> | <input type="checkbox"/> | <input type="checkbox"/> |

| 8. Do YOU want to do what your parent/caregiver thinks you should?                                                         | No, Not At All           | No, Not Really           | Yes, A Little            | Yes, For Sure            |
|----------------------------------------------------------------------------------------------------------------------------|--------------------------|--------------------------|--------------------------|--------------------------|
| a. I want to <u>eat healthier</u> if my parent/caregiver thinks I should.                                                  | <input type="checkbox"/> | <input type="checkbox"/> | <input type="checkbox"/> | <input type="checkbox"/> |
| b. I want to <u>exercise</u> if my parent/caregiver thinks I should.                                                       | <input type="checkbox"/> | <input type="checkbox"/> | <input type="checkbox"/> | <input type="checkbox"/> |
| c. I want to <u>set goals to improve my eating and physical activity habits</u> if my parent/caregiver thinks I should.    | <input type="checkbox"/> | <input type="checkbox"/> | <input type="checkbox"/> | <input type="checkbox"/> |
| d. I want to <u>write in a journal about my eating and physical activity habits</u> if my parent/caregiver thinks I should | <input type="checkbox"/> | <input type="checkbox"/> | <input type="checkbox"/> | <input type="checkbox"/> |
| e. I want to <u>help plan, shop for, or make healthy foods</u> if my parent/caregiver thinks I should.                     | <input type="checkbox"/> | <input type="checkbox"/> | <input type="checkbox"/> | <input type="checkbox"/> |

| 9. Do you think you can ...                                                                   | No, Not At All           | No, Not Really           | Yes, A Little            | Yes, For Sure            |
|-----------------------------------------------------------------------------------------------|--------------------------|--------------------------|--------------------------|--------------------------|
| a. Talk with your family about how you can eat healthier foods or get more physical activity? | <input type="checkbox"/> | <input type="checkbox"/> | <input type="checkbox"/> | <input type="checkbox"/> |
| b. Help plan for, shop, or make healthy foods each week?                                      | <input type="checkbox"/> | <input type="checkbox"/> | <input type="checkbox"/> | <input type="checkbox"/> |
| c. Use nutrition facts labels on packages to pick healthy foods?                              | <input type="checkbox"/> | <input type="checkbox"/> | <input type="checkbox"/> | <input type="checkbox"/> |
| d. Choose healthy foods and drinks at home?                                                   | <input type="checkbox"/> | <input type="checkbox"/> | <input type="checkbox"/> | <input type="checkbox"/> |
| e. Choose healthy foods and drinks at restaurants, including fast food restaurants?           | <input type="checkbox"/> | <input type="checkbox"/> | <input type="checkbox"/> | <input type="checkbox"/> |
| f. Plan what physical activities you will do for the week?                                    | <input type="checkbox"/> | <input type="checkbox"/> | <input type="checkbox"/> | <input type="checkbox"/> |
| g. Exercise for one hour every day?                                                           | <input type="checkbox"/> | <input type="checkbox"/> | <input type="checkbox"/> | <input type="checkbox"/> |
| h. Exercise even if things get in your way, like if you are too tired or very busy?           | <input type="checkbox"/> | <input type="checkbox"/> | <input type="checkbox"/> | <input type="checkbox"/> |
| i. Choose to be active instead of watching TV or sitting at the computer?                     | <input type="checkbox"/> | <input type="checkbox"/> | <input type="checkbox"/> | <input type="checkbox"/> |
| j. Do bone-strengthening physical activities like running or jumping rope?                    | <input type="checkbox"/> | <input type="checkbox"/> | <input type="checkbox"/> | <input type="checkbox"/> |

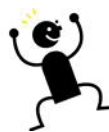

**You're past the half-way point!**

|                                                                                                                                                                                                                                                                                                                 |  |  |  |  |
|-----------------------------------------------------------------------------------------------------------------------------------------------------------------------------------------------------------------------------------------------------------------------------------------------------------------|--|--|--|--|
| <b>10. The most important time in life for building strong bones is when you are a/an...</b>                                                                                                                                                                                                                    |  |  |  |  |
| <input type="checkbox"/> Baby or young child (ages 0-8)<br><input type="checkbox"/> Preteen or teen (ages 9-18)<br><input type="checkbox"/> Young adult (ages 19-29)<br><input type="checkbox"/> Adult (ages 30 to 54)<br><input type="checkbox"/> Older adult (age 55+)<br><input type="checkbox"/> Don't know |  |  |  |  |
| <b>11. The amount of food you choose to eat for a meal or a snack...</b>                                                                                                                                                                                                                                        |  |  |  |  |
| <input type="checkbox"/> Serving <input type="checkbox"/> Plate <input type="checkbox"/> Portion Size <input type="checkbox"/> Don't know                                                                                                                                                                       |  |  |  |  |
| <b>12. A measured amount of food or drink that you can find on a nutrition facts label is the...</b>                                                                                                                                                                                                            |  |  |  |  |
| <input type="checkbox"/> Recipe <input type="checkbox"/> Portion size <input type="checkbox"/> Serving <input type="checkbox"/> Don't know                                                                                                                                                                      |  |  |  |  |
| <b>13. The dangers of having an unhealthy diet can be: (Choose one or more.)</b>                                                                                                                                                                                                                                |  |  |  |  |
| <input type="checkbox"/> Not getting enough nutrients to grow and develop<br><input type="checkbox"/> Higher risk for diseases like osteoporosis or diabetes<br><input type="checkbox"/> Higher risk for being overweight<br><input type="checkbox"/> Don't know                                                |  |  |  |  |
| <b>14. Which foods contain calcium? (Choose one or more.)</b>                                                                                                                                                                                                                                                   |  |  |  |  |
| <input type="checkbox"/> Milk <input type="checkbox"/> Fortified orange juice <input type="checkbox"/> Peaches <input type="checkbox"/> Water <input type="checkbox"/> Don't know                                                                                                                               |  |  |  |  |
| <b>15. Which foods contain vitamin D? (Choose one or more.)</b>                                                                                                                                                                                                                                                 |  |  |  |  |
| <input type="checkbox"/> Salmon <input type="checkbox"/> Chicken <input type="checkbox"/> Fortified Milk <input type="checkbox"/> Spinach <input type="checkbox"/> Don't know                                                                                                                                   |  |  |  |  |
| <b>16. Which sandwich has less fat?</b>                                                                                                                                                                                                                                                                         |  |  |  |  |
| <input type="checkbox"/> Fried chicken sandwich <input type="checkbox"/> Grilled chicken sandwich <input type="checkbox"/> They both have the same amount of fat <input type="checkbox"/> Don't know                                                                                                            |  |  |  |  |
| <b>17. How can physical activity help you? (Choose one or more.)</b>                                                                                                                                                                                                                                            |  |  |  |  |
| <input type="checkbox"/> Helps you control your weight <input type="checkbox"/> Lowers your chance of getting high blood pressure <input type="checkbox"/> Helps you feel less stressed <input type="checkbox"/> Decreases your vitamin C levels <input type="checkbox"/> Don't know                            |  |  |  |  |
| <b>18. To strengthen your bones you should:</b>                                                                                                                                                                                                                                                                 |  |  |  |  |
| <input type="checkbox"/> Swim 3 times a week <input type="checkbox"/> Do stretching exercises, like touching your toes <input type="checkbox"/> Do activities like jumping and dancing <input type="checkbox"/> Don't know                                                                                      |  |  |  |  |

| 19. Tell us about the past 7 days. On how many days did you...              | 0 Days                   | 1-2 Day                  | 3-4 Days                 | 5-7 Days                 |
|-----------------------------------------------------------------------------|--------------------------|--------------------------|--------------------------|--------------------------|
| a. Write in a journal your eating and physical activity habits?             | <input type="checkbox"/> | <input type="checkbox"/> | <input type="checkbox"/> | <input type="checkbox"/> |
| b. Work toward goals you set to eat healthy foods and be physically active? | <input type="checkbox"/> | <input type="checkbox"/> | <input type="checkbox"/> | <input type="checkbox"/> |
| c. Help plan healthy meals and snacks?                                      | <input type="checkbox"/> | <input type="checkbox"/> | <input type="checkbox"/> | <input type="checkbox"/> |
| d. Help shop for healthy foods and drinks?                                  | <input type="checkbox"/> | <input type="checkbox"/> | <input type="checkbox"/> | <input type="checkbox"/> |
| e. Help make healthy meals or snacks?                                       | <input type="checkbox"/> | <input type="checkbox"/> | <input type="checkbox"/> | <input type="checkbox"/> |
| f. Eat a healthy breakfast?                                                 | <input type="checkbox"/> | <input type="checkbox"/> | <input type="checkbox"/> | <input type="checkbox"/> |
| g. Take a healthy bag lunch to school?                                      | <input type="checkbox"/> | <input type="checkbox"/> | <input type="checkbox"/> | <input type="checkbox"/> |
| h. Eat dinner together with your family?                                    | <input type="checkbox"/> | <input type="checkbox"/> | <input type="checkbox"/> | <input type="checkbox"/> |
| i. Exercise for one hour?                                                   | <input type="checkbox"/> | <input type="checkbox"/> | <input type="checkbox"/> | <input type="checkbox"/> |
| j. Exercise with your parent or caregiver?                                  | <input type="checkbox"/> | <input type="checkbox"/> | <input type="checkbox"/> | <input type="checkbox"/> |
| k. Do bone-strengthening exercises (like running or jumping rope)?          | <input type="checkbox"/> | <input type="checkbox"/> | <input type="checkbox"/> | <input type="checkbox"/> |

| 20. Think about the past 7 days. Did your parent/caregiver encourage you to...                                           | No                       | Yes                      |
|--------------------------------------------------------------------------------------------------------------------------|--------------------------|--------------------------|
| a. Eat a healthy mix of foods like fruits, vegetables, whole grains, low-fat or fat-free dairy foods, and protein foods? | <input type="checkbox"/> | <input type="checkbox"/> |
| b. Exercise each day for one hour?                                                                                       | <input type="checkbox"/> | <input type="checkbox"/> |
| c. Set goals to improve your eating and physical activity habits?                                                        | <input type="checkbox"/> | <input type="checkbox"/> |
| d. Write in a journal about your eating and physical activity habits?                                                    | <input type="checkbox"/> | <input type="checkbox"/> |
| e. Help plan, shop for, or make healthy foods?                                                                           | <input type="checkbox"/> | <input type="checkbox"/> |
| f. Be active instead of watching TV and/or sitting at the computer?                                                      | <input type="checkbox"/> | <input type="checkbox"/> |

| 21. Think about what you eat on an AVERAGE DAY. How many times do you eat or drink... | 0 Times                  | 1 Time                   | 2 Times                  | 3 Times                  | 4 Times                  | 5+ Times                 |
|---------------------------------------------------------------------------------------|--------------------------|--------------------------|--------------------------|--------------------------|--------------------------|--------------------------|
| a. Dairy foods like milk, yogurt, cheese, and fortified soy beverages?                | <input type="checkbox"/> |
| b. Soda or pop?                                                                       | <input type="checkbox"/> |
| c. Fruits (including 100% fruit juice)?                                               | <input type="checkbox"/> |
| d. Protein foods like meats, poultry, seafood, beans, and tofu?                       | <input type="checkbox"/> |
| e. Chips or French fries?                                                             | <input type="checkbox"/> |
| f. Vegetables?                                                                        | <input type="checkbox"/> |
| g. Candy, cookies, cake, or other sweets?                                             | <input type="checkbox"/> |
| h. Grains like bread, oatmeal, and rice?                                              | <input type="checkbox"/> |

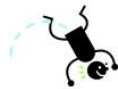

One page to go!



**About You:**

|                                                                                                                                                                                                                                                                                                                                                                            |
|----------------------------------------------------------------------------------------------------------------------------------------------------------------------------------------------------------------------------------------------------------------------------------------------------------------------------------------------------------------------------|
| <b>22. I am a:</b> <input type="checkbox"/> Male <input type="checkbox"/> Female                                                                                                                                                                                                                                                                                           |
| <b>23. How old are you?</b><br><input type="checkbox"/> Less than 9 yrs <input type="checkbox"/> 10 yrs <input type="checkbox"/> 12 yrs <input type="checkbox"/> 14 yrs<br><input type="checkbox"/> 9 yrs <input type="checkbox"/> 11 yrs <input type="checkbox"/> 13 yrs <input type="checkbox"/> More than 14 yrs                                                        |
| <b>24. What grade are you in?</b><br><input type="checkbox"/> 4 <sup>th</sup> <input type="checkbox"/> 5 <sup>th</sup> <input type="checkbox"/> 6 <sup>th</sup> <input type="checkbox"/> 7 <sup>th</sup> <input type="checkbox"/> 8 <sup>th</sup> <input type="checkbox"/> 9 <sup>th</sup> <input type="checkbox"/> 10 <sup>th</sup> <input type="checkbox"/> Other: _____ |
| <b>25. Are you Hispanic or Latino?</b> <input type="checkbox"/> No <input type="checkbox"/> Yes                                                                                                                                                                                                                                                                            |
| <b>26. What is your race?(Choose one or more.)</b><br><input type="checkbox"/> Black/African American <input type="checkbox"/> American Indian or Alaska Native <input type="checkbox"/> Asian<br><input type="checkbox"/> White <input type="checkbox"/> Native Hawaiian or other Pacific Islander                                                                        |
| <b>27a. Did you go to any education programs about healthy eating or physical activity outside of school time in the past 6 months?</b><br><input type="checkbox"/> No <input type="checkbox"/> Yes                                                                                                                                                                        |
| <b>27b. If you checked "yes," please describe the program:</b> _____                                                                                                                                                                                                                                                                                                       |
| <b>28. How would you describe your eating habits?</b><br><input type="checkbox"/> Not at all healthy <input type="checkbox"/> Not very healthy <input type="checkbox"/> Healthy <input type="checkbox"/> Very healthy                                                                                                                                                      |
| <b>29. How would you describe your exercise habits?</b><br><input type="checkbox"/> Not at all healthy <input type="checkbox"/> Not very healthy <input type="checkbox"/> Healthy <input type="checkbox"/> Very healthy                                                                                                                                                    |

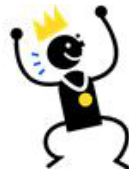

**You're all done! Thanks so much for your help!!**

**Appendix C: Outcome Evaluation Instruments -  
Child Exit Survey**

Form Approved OMB No. 0990-0385  
Exp. Date: 12/31/2014

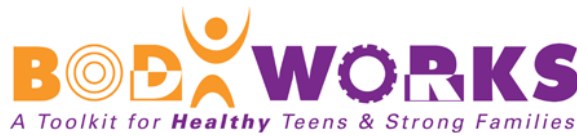

**Child Exit Survey**

This survey is important. It asks about the *BodyWorks* program, your health and your eating and physical activity habits. By taking this survey, you will help us make *BodyWorks* better. It will take about 20 minutes. Please read each question before you write your answer. Pick one answer for each question, unless the directions say you can pick more than one. You can skip a question that you do not want to answer. Circle the question number to let us know you skipped it on purpose. **This is NOT a test!** Be as honest as you can. Your answers are private.

|                                                                                                                                                                                                                            |                                                   |                                                  |
|----------------------------------------------------------------------------------------------------------------------------------------------------------------------------------------------------------------------------|---------------------------------------------------|--------------------------------------------------|
| Please write the first and last initials of the <b>parent or caregiver who came with you to this program.</b><br><i>[Ex: For <u>J</u>ane <u>S</u>mith, it is J.S. For <u>J</u>ane <u>D</u>oe-<u>S</u>mith, it is J.S.]</i> | _____<br>Parent's or Caregiver's<br>First Initial | _____<br>Parent's or Caregiver's<br>Last Initial |
|----------------------------------------------------------------------------------------------------------------------------------------------------------------------------------------------------------------------------|---------------------------------------------------|--------------------------------------------------|

|                                                                                                                                                                                    |                                                                                                                             |
|------------------------------------------------------------------------------------------------------------------------------------------------------------------------------------|-----------------------------------------------------------------------------------------------------------------------------|
| What is your <b>MONTH and YEAR</b> of BIRTH?<br><i>[Ex: Write 05/95 if your birthday is in May of 1995]</i><br><br>If you are a twin, tell us if you are the older or younger twin | _____ / _____<br>MM                  YY<br><br><input type="checkbox"/> Older twin<br><input type="checkbox"/> Younger twin |
|------------------------------------------------------------------------------------------------------------------------------------------------------------------------------------|-----------------------------------------------------------------------------------------------------------------------------|

|                                                                                                                                                                                                                                                                                                                                                                                                                                                                                                                                                  |
|--------------------------------------------------------------------------------------------------------------------------------------------------------------------------------------------------------------------------------------------------------------------------------------------------------------------------------------------------------------------------------------------------------------------------------------------------------------------------------------------------------------------------------------------------|
| <b>1. Right now, how do you feel about making changes to your <u>eating habits</u>?</b><br><input type="checkbox"/> I have not thought about making any changes.<br><input type="checkbox"/> I plan to make changes later, maybe in 6 months.<br><input type="checkbox"/> I want to make changes soon, maybe in the next month.<br><input type="checkbox"/> I am making changes right now, but this has been for less than 6 months.<br><input type="checkbox"/> I have made changes and have kept up with them for 6 months or longer.          |
| <b>2. How much do you want to make changes to your <u>eating habits</u>?</b><br><input type="checkbox"/> Not at all<br><input type="checkbox"/> Very little<br><input type="checkbox"/> Some<br><input type="checkbox"/> A lot                                                                                                                                                                                                                                                                                                                   |
| <b>3. Right now, how do you feel about making changes to your <u>exercise habits</u>?</b><br><input type="checkbox"/> I have not thought about making any changes.<br><input type="checkbox"/> I plan to make changes in the future, maybe in 6 months.<br><input type="checkbox"/> I want to make changes soon, maybe in the next month.<br><input type="checkbox"/> I am making changes right now, but this has been for less than 6 months.<br><input type="checkbox"/> I have made changes and have kept up with them for 6 months or longer |
| <b>4. How much do you want to make changes to your <u>exercise habits</u>?</b><br><input type="checkbox"/> Not at all<br><input type="checkbox"/> Very little<br><input type="checkbox"/> Some<br><input type="checkbox"/> A lot                                                                                                                                                                                                                                                                                                                 |

According to the Paperwork Reduction Act of 1995, no persons are required to respond to a collection of information unless it displays a valid OMB control number. The valid OMB control number for this information collection is 0990-0385. The time required to complete this information collection is estimated to average 20 minutes per response, including the time to review instructions, search existing data resources, gather the data needed, and complete and review the information collection. If you have comments concerning the accuracy of the time estimate(s) or suggestions for improving this form, please write to: U.S. Department of Health & Human Services, OS/OCIO/PRA, 200 Independence Ave., S.W., Suite 537-H, Washington D.C. 20201, Attention: PRA Reports Clearance Officer

| 5a. How important to YOU is...                                                                                              | Not At All Important     | Not Very Important       | Important                | Very Important           |
|-----------------------------------------------------------------------------------------------------------------------------|--------------------------|--------------------------|--------------------------|--------------------------|
| a. Eating a healthy mix of foods like fruits, vegetables, whole grains, low-fat or fat-free dairy foods, and protein foods? | <input type="checkbox"/> | <input type="checkbox"/> | <input type="checkbox"/> | <input type="checkbox"/> |
| b. Exercising for one hour every day?                                                                                       | <input type="checkbox"/> | <input type="checkbox"/> | <input type="checkbox"/> | <input type="checkbox"/> |
| c. Setting goals to improve your eating and physical activity habits?                                                       | <input type="checkbox"/> | <input type="checkbox"/> | <input type="checkbox"/> | <input type="checkbox"/> |
| d. Writing in a journal about your eating and physical activity habits?                                                     | <input type="checkbox"/> | <input type="checkbox"/> | <input type="checkbox"/> | <input type="checkbox"/> |
| e. Helping your parent or caregiver plan, shop for, or make healthy foods?                                                  | <input type="checkbox"/> | <input type="checkbox"/> | <input type="checkbox"/> | <input type="checkbox"/> |
| f. Preventing diseases that happen later in life?                                                                           | <input type="checkbox"/> | <input type="checkbox"/> | <input type="checkbox"/> | <input type="checkbox"/> |

| 5b. How important is it to your PARENT/CAREGIVER that <u>you</u> ...  | Not At All Important     | Not Very Important       | Important                | Very Important           |
|-----------------------------------------------------------------------|--------------------------|--------------------------|--------------------------|--------------------------|
| a. Eat a healthy diet?                                                | <input type="checkbox"/> | <input type="checkbox"/> | <input type="checkbox"/> | <input type="checkbox"/> |
| b. Exercise each day for one hour?                                    | <input type="checkbox"/> | <input type="checkbox"/> | <input type="checkbox"/> | <input type="checkbox"/> |
| c. Set goals to improve your eating and physical activity habits?     | <input type="checkbox"/> | <input type="checkbox"/> | <input type="checkbox"/> | <input type="checkbox"/> |
| d. Write in a journal about your eating and physical activity habits? | <input type="checkbox"/> | <input type="checkbox"/> | <input type="checkbox"/> | <input type="checkbox"/> |
| e. Help plan, shop for, or make healthy foods?                        | <input type="checkbox"/> | <input type="checkbox"/> | <input type="checkbox"/> | <input type="checkbox"/> |

| 6. Do YOU want to do what your parent/caregiver thinks you should?                                                  | No, Not At All           | No, Not Really           | Yes, A Little            | Yes, For Sure            |
|---------------------------------------------------------------------------------------------------------------------|--------------------------|--------------------------|--------------------------|--------------------------|
| a. I want to eat healthier if my parent/caregiver thinks I should.                                                  | <input type="checkbox"/> | <input type="checkbox"/> | <input type="checkbox"/> | <input type="checkbox"/> |
| b. I want to exercise if my parent/caregiver thinks I should.                                                       | <input type="checkbox"/> | <input type="checkbox"/> | <input type="checkbox"/> | <input type="checkbox"/> |
| c. I want to set goals to improve my eating and physical activity habits if my parent/caregiver thinks I should.    | <input type="checkbox"/> | <input type="checkbox"/> | <input type="checkbox"/> | <input type="checkbox"/> |
| d. I want to write in a journal about my eating and physical activity habits if my parent/caregiver thinks I should | <input type="checkbox"/> | <input type="checkbox"/> | <input type="checkbox"/> | <input type="checkbox"/> |
| e. I want to help plan, shop for, or make healthy foods if my parent/caregiver thinks I should.                     | <input type="checkbox"/> | <input type="checkbox"/> | <input type="checkbox"/> | <input type="checkbox"/> |

| 7. Do you think you can ...                                                                   | No, Not At All           | No, Not Really           | Yes, A Little            | Yes, For Sure            |
|-----------------------------------------------------------------------------------------------|--------------------------|--------------------------|--------------------------|--------------------------|
| a. Talk with your family about how you can eat healthier foods or get more physical activity? | <input type="checkbox"/> | <input type="checkbox"/> | <input type="checkbox"/> | <input type="checkbox"/> |
| b. Help plan for, shop, or make healthy foods each week?                                      | <input type="checkbox"/> | <input type="checkbox"/> | <input type="checkbox"/> | <input type="checkbox"/> |
| c. Use nutrition facts labels on packages to pick healthy foods?                              | <input type="checkbox"/> | <input type="checkbox"/> | <input type="checkbox"/> | <input type="checkbox"/> |
| d. Choose healthy foods and drinks at home?                                                   | <input type="checkbox"/> | <input type="checkbox"/> | <input type="checkbox"/> | <input type="checkbox"/> |
| e. Choose healthy foods and drinks at restaurants, including fast food restaurants?           | <input type="checkbox"/> | <input type="checkbox"/> | <input type="checkbox"/> | <input type="checkbox"/> |
| f. Plan what physical activities you will do for the week?                                    | <input type="checkbox"/> | <input type="checkbox"/> | <input type="checkbox"/> | <input type="checkbox"/> |
| g. Exercise for one hour every day?                                                           | <input type="checkbox"/> | <input type="checkbox"/> | <input type="checkbox"/> | <input type="checkbox"/> |
| h. Exercise even if things get in your way, like if you are too tired or very busy?           | <input type="checkbox"/> | <input type="checkbox"/> | <input type="checkbox"/> | <input type="checkbox"/> |
| i. Choose to be active instead of watching TV or sitting at the computer?                     | <input type="checkbox"/> | <input type="checkbox"/> | <input type="checkbox"/> | <input type="checkbox"/> |
| j. Do bone-strengthening physical activities like running or jumping rope?                    | <input type="checkbox"/> | <input type="checkbox"/> | <input type="checkbox"/> | <input type="checkbox"/> |

**8. The most important time in life for building strong bones is when you are a/an...**

Baby or young child (ages 0-8)  
 Preteen or teen (ages 9-18)  
 Young adult (ages 19-29)  
 Adult (ages 30 to 54)  
 Older adult (age 55+)  
 Don't know

**9. The amount of food you choose to eat for a meal or a snack is a...**

Serving       Plate       Portion Size       Don't know

**10. A measured amount of food or drink that you can find on a nutrition facts label is the...**

Recipe       Portion Size       Serving       Don't know

**11. The dangers of having an unhealthy diet can be: (Choose one or more.)**

Not getting enough nutrients to grow and develop  
 Higher risk for diseases like osteoporosis or diabetes  
 Higher risk for being overweight  
 Don't know

**12. Which foods contain calcium? (Choose one or more.)**

Milk       Fortified orange juice       Peaches       Water       Don't know

**13. Which foods contain vitamin D? (Choose one or more.)**

Salmon       Chicken       Fortified Milk       Spinach       Don't know

**14. Which sandwich has less fat?**

Fried chicken sandwich       Grilled chicken sandwich       They both have the same amount of fat       Don't know

**15. How can physical activity help you? (Choose one or more.)**

Helps you control your weight       Lowers your chance of getting high blood pressure       Helps you feel less stressed       Decreases your vitamin C levels       Don't know

**16. To strengthen your bones you should:**

Swim 3 times a week       Do stretching exercises, like touching your toes       Do activities like jumping and dancing       Don't know

| <b>17. Tell us about the <u>past 7 days</u>. On how many days did you...</b> | <b>0 Days</b>            | <b>1-2 Day</b>           | <b>3-4 Days</b>          | <b>5-7 Days</b>          |
|------------------------------------------------------------------------------|--------------------------|--------------------------|--------------------------|--------------------------|
| a. Write in a journal what you ate and how much physical activity you did?   | <input type="checkbox"/> | <input type="checkbox"/> | <input type="checkbox"/> | <input type="checkbox"/> |
| b. Work toward goals you set to eat healthy foods and be physically active?  | <input type="checkbox"/> | <input type="checkbox"/> | <input type="checkbox"/> | <input type="checkbox"/> |
| c. Help plan healthy meals and snacks?                                       | <input type="checkbox"/> | <input type="checkbox"/> | <input type="checkbox"/> | <input type="checkbox"/> |
| d. Help shop for healthy foods and drinks?                                   | <input type="checkbox"/> | <input type="checkbox"/> | <input type="checkbox"/> | <input type="checkbox"/> |
| e. Help make healthy meals or snacks?                                        | <input type="checkbox"/> | <input type="checkbox"/> | <input type="checkbox"/> | <input type="checkbox"/> |
| f. Eat a healthy breakfast?                                                  | <input type="checkbox"/> | <input type="checkbox"/> | <input type="checkbox"/> | <input type="checkbox"/> |
| g. Take a healthy bag lunch to school?                                       | <input type="checkbox"/> | <input type="checkbox"/> | <input type="checkbox"/> | <input type="checkbox"/> |
| h. Eat dinner together with your family?                                     | <input type="checkbox"/> | <input type="checkbox"/> | <input type="checkbox"/> | <input type="checkbox"/> |
| i. Exercise for one hour?                                                    | <input type="checkbox"/> | <input type="checkbox"/> | <input type="checkbox"/> | <input type="checkbox"/> |
| j. Exercise with your parent or caregiver?                                   | <input type="checkbox"/> | <input type="checkbox"/> | <input type="checkbox"/> | <input type="checkbox"/> |
| k. Do bone-strengthening exercises (like walking or jumping rope)?           | <input type="checkbox"/> | <input type="checkbox"/> | <input type="checkbox"/> | <input type="checkbox"/> |

| 18. Think about the past 7 days. Did your parent/caregiver encourage you to...                                           | No                       | Yes                      |
|--------------------------------------------------------------------------------------------------------------------------|--------------------------|--------------------------|
| a. Eat a healthy mix of foods like fruits, vegetables, whole grains, low-fat or fat-free dairy foods, and protein foods? | <input type="checkbox"/> | <input type="checkbox"/> |
| b. Exercise each day for one hour?                                                                                       | <input type="checkbox"/> | <input type="checkbox"/> |
| c. Set goals to improve your eating and physical activity habits?                                                        | <input type="checkbox"/> | <input type="checkbox"/> |
| d. Write in a journal about your eating and physical activity habits?                                                    | <input type="checkbox"/> | <input type="checkbox"/> |
| e. Help plan, shop for, or make healthy foods?                                                                           | <input type="checkbox"/> | <input type="checkbox"/> |
| f. Be active instead of watching TV and/or sitting at the computer?                                                      | <input type="checkbox"/> | <input type="checkbox"/> |

| 19. Think about what you eat on an AVERAGE DAY. How many times do you eat or drink... | 0 Times                  | 1 Time                   | 2 Times                  | 3 Times                  | 4 Times                  | 5+ Times                 |
|---------------------------------------------------------------------------------------|--------------------------|--------------------------|--------------------------|--------------------------|--------------------------|--------------------------|
| a. Dairy foods like milk, yogurt, cheese, and fortified soy beverages?                | <input type="checkbox"/> |
| b. Soda or pop?                                                                       | <input type="checkbox"/> |
| c. Fruits (including 100% fruit juice)?                                               | <input type="checkbox"/> |
| d. Protein foods like meats, poultry, seafood, beans, and tofu?                       | <input type="checkbox"/> |
| e. Chips or French fries?                                                             | <input type="checkbox"/> |
| f. Vegetables?                                                                        | <input type="checkbox"/> |
| g. Candy, cookies, cake, or other sweets?                                             | <input type="checkbox"/> |
| h. Grains like bread, oatmeal, and rice?                                              | <input type="checkbox"/> |

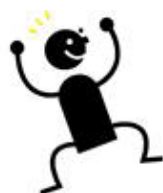

**You're past the half-way point!**

**This section asks about your experience with the BodyWorks program.**

**20. How many sessions did you attend? (Circle one.)**

1      2      3      4      5      6      7      8      More than 8

---

**21. If you missed one or more sessions, what were the reasons? (Choose one or more.)**

I was busy with something else, like responsibilities at school, work, or home

I was sick

I did not have a way to get there

I did not like the group members

I did not finish the BodyWorks homework

I never missed a session

Other: \_\_\_\_\_

**22a. Below is a list of activities that trainers might have done to encourage people to keep coming to BodyWorks. If your trainer did these things, please check how much they encouraged you to keep coming to BodyWorks. If your trainer did NOT do this activity, please check "My trainer did NOT do this."**

| How encouraging was it when your trainer...                                 | Not At All Encouraging   | Not Really Encouraging   | A Little Encouraging     | Very Encouraging         | My trainer DID NOT do this. |
|-----------------------------------------------------------------------------|--------------------------|--------------------------|--------------------------|--------------------------|-----------------------------|
| a. Contacted you before a session to remind you to attend?                  | <input type="checkbox"/>    |
| b. Contacted you when you missed a session?                                 | <input type="checkbox"/>    |
| c. Gave you prizes such as coupons, gift cards, water bottles, or t-shirts? | <input type="checkbox"/>    |
| d. Paid for you or your family to get a ride to BodyWorks?                  | <input type="checkbox"/>    |
| e. Other (please specify): _____                                            | <input type="checkbox"/>    |

**22b. If your trainer gave you prizes to participate in BodyWorks, please describe the prizes you received:**

\_\_\_\_\_

\_\_\_\_\_

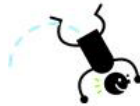

**Just two pages left. You're doing great!**

23. Tell us how helpful the BodyWorks toolkit items were to you. If you did NOT use a particular toolkit item, please check "I did NOT use this toolkit item."

| How HELPFUL were the following BodyWorks Toolkit Items? | Not At All Helpful       | Not Very Helpful         | Helpful                  | Very Helpful             | I did NOT use this toolkit item. |
|---------------------------------------------------------|--------------------------|--------------------------|--------------------------|--------------------------|----------------------------------|
| a. Body Basics                                          | <input type="checkbox"/>         |
| b. BodyWorks For Teens                                  | <input type="checkbox"/>         |
| c. BodyWorks for Guys                                   | <input type="checkbox"/>         |
| d. Best Journal Ever!                                   | <input type="checkbox"/>         |
| e. Deliciously Healthy Family Meals Cookbook            | <input type="checkbox"/>         |
| f. Let's Shop, Cook, and Eat Together DVD               | <input type="checkbox"/>         |
| g. Shopping Lists                                       | <input type="checkbox"/>         |
| h. Weekly Planner refrigerator magnet                   | <input type="checkbox"/>         |

24. How often did you use any of the toolkit items with your parent or caregiver outside of the BodyWorks sessions?

Never  
 Rarely  
 Sometimes  
 Often

---

25. If parts of the BodyWorks Toolkit were not helpful, what could make them better?

\_\_\_\_\_

\_\_\_\_\_

| 26. My BodyWorks Trainer(s)...              | Disagree a lot           | Disagree                 | Agree                    | Agree a lot              |
|---------------------------------------------|--------------------------|--------------------------|--------------------------|--------------------------|
| a. Showed up on time                        | <input type="checkbox"/> | <input type="checkbox"/> | <input type="checkbox"/> | <input type="checkbox"/> |
| b. Was well prepared for each session       | <input type="checkbox"/> | <input type="checkbox"/> | <input type="checkbox"/> | <input type="checkbox"/> |
| c. Knew a lot about the topics we discussed | <input type="checkbox"/> | <input type="checkbox"/> | <input type="checkbox"/> | <input type="checkbox"/> |
| d. Made me feel comfortable in the group    | <input type="checkbox"/> | <input type="checkbox"/> | <input type="checkbox"/> | <input type="checkbox"/> |
| e. Treated me with respect                  | <input type="checkbox"/> | <input type="checkbox"/> | <input type="checkbox"/> | <input type="checkbox"/> |
| f. Connected well with the group            | <input type="checkbox"/> | <input type="checkbox"/> | <input type="checkbox"/> | <input type="checkbox"/> |
| g. Included everyone in activities          | <input type="checkbox"/> | <input type="checkbox"/> | <input type="checkbox"/> | <input type="checkbox"/> |
| h. Managed any problems that arose          | <input type="checkbox"/> | <input type="checkbox"/> | <input type="checkbox"/> | <input type="checkbox"/> |

| 27. Think about the BodyWorks program. How much did you like... | Did not like at all      | Liked a little           | Liked                    | Liked a lot              |
|-----------------------------------------------------------------|--------------------------|--------------------------|--------------------------|--------------------------|
| a. <u>Where</u> the BodyWorks sessions were held?               | <input type="checkbox"/> | <input type="checkbox"/> | <input type="checkbox"/> | <input type="checkbox"/> |
| b. <u>When</u> the BodyWorks sessions were held?                | <input type="checkbox"/> | <input type="checkbox"/> | <input type="checkbox"/> | <input type="checkbox"/> |
| c. <u>How long</u> each of the BodyWorks sessions lasted?       | <input type="checkbox"/> | <input type="checkbox"/> | <input type="checkbox"/> | <input type="checkbox"/> |
| d. The number of sessions for parents?                          | <input type="checkbox"/> | <input type="checkbox"/> | <input type="checkbox"/> | <input type="checkbox"/> |
| e. The number sessions for children?                            | <input type="checkbox"/> | <input type="checkbox"/> | <input type="checkbox"/> | <input type="checkbox"/> |

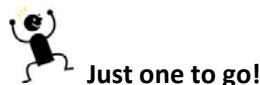

| 28. How much did you like the: | Did not like at all      | Liked a little           | Liked                    | Liked a lot              |
|--------------------------------|--------------------------|--------------------------|--------------------------|--------------------------|
| a. Session topics              | <input type="checkbox"/> | <input type="checkbox"/> | <input type="checkbox"/> | <input type="checkbox"/> |
| b. Activities/Demonstrations   | <input type="checkbox"/> | <input type="checkbox"/> | <input type="checkbox"/> | <input type="checkbox"/> |
| c. Snacks                      | <input type="checkbox"/> | <input type="checkbox"/> | <input type="checkbox"/> | <input type="checkbox"/> |
| d. Physical Activities         | <input type="checkbox"/> | <input type="checkbox"/> | <input type="checkbox"/> | <input type="checkbox"/> |
| e. BodyWorks program overall   | <input type="checkbox"/> | <input type="checkbox"/> | <input type="checkbox"/> | <input type="checkbox"/> |

29. What would make the BodyWorks program better? *(Write your answer in the space below.)*

---



---



---

30a. Not including BodyWorks and PE or health class at school, did you go to any education programs about healthy eating or physical activity in the last 8 weeks?

No       Yes

30b. If you checked "yes," please describe the program:

---



---

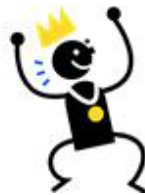

**You're all done! Thank you for your help!!**





| 5a. How important to YOU is...                                                                                              | Not At All Important     | Not Very Important       | Important                | Very Important           |
|-----------------------------------------------------------------------------------------------------------------------------|--------------------------|--------------------------|--------------------------|--------------------------|
| a. Eating a healthy mix of foods like fruits, vegetables, whole grains, low-fat or fat-free dairy foods, and protein foods? | <input type="checkbox"/> | <input type="checkbox"/> | <input type="checkbox"/> | <input type="checkbox"/> |
| b. Exercising for one hour every day?                                                                                       | <input type="checkbox"/> | <input type="checkbox"/> | <input type="checkbox"/> | <input type="checkbox"/> |
| c. Setting goals to improve your eating and physical activity habits?                                                       | <input type="checkbox"/> | <input type="checkbox"/> | <input type="checkbox"/> | <input type="checkbox"/> |
| d. Writing in a journal about your eating and physical activity habits?                                                     | <input type="checkbox"/> | <input type="checkbox"/> | <input type="checkbox"/> | <input type="checkbox"/> |
| e. Helping your parent or caregiver plan, shop for, or make healthy foods?                                                  | <input type="checkbox"/> | <input type="checkbox"/> | <input type="checkbox"/> | <input type="checkbox"/> |
| f. Preventing diseases that happen later in life?                                                                           | <input type="checkbox"/> | <input type="checkbox"/> | <input type="checkbox"/> | <input type="checkbox"/> |

| 5b. How important is it to your PARENT/CAREGIVER that you...          | Not At All Important     | Not Very Important       | Important                | Very Important           |
|-----------------------------------------------------------------------|--------------------------|--------------------------|--------------------------|--------------------------|
| a. Eat a healthy diet?                                                | <input type="checkbox"/> | <input type="checkbox"/> | <input type="checkbox"/> | <input type="checkbox"/> |
| b. Exercise each day for one hour?                                    | <input type="checkbox"/> | <input type="checkbox"/> | <input type="checkbox"/> | <input type="checkbox"/> |
| c. Set goals to improve your eating and physical activity habits?     | <input type="checkbox"/> | <input type="checkbox"/> | <input type="checkbox"/> | <input type="checkbox"/> |
| d. Write in a journal about your eating and physical activity habits? | <input type="checkbox"/> | <input type="checkbox"/> | <input type="checkbox"/> | <input type="checkbox"/> |
| e. Help plan, shop for, or make healthy foods?                        | <input type="checkbox"/> | <input type="checkbox"/> | <input type="checkbox"/> | <input type="checkbox"/> |

| 6. Do YOU want to do what your parent/caregiver thinks you should?                                                   | No, Not At All           | No, Not Really           | Yes, A Little            | Yes, For Sure            |
|----------------------------------------------------------------------------------------------------------------------|--------------------------|--------------------------|--------------------------|--------------------------|
| a. I want to eat healthier if my parent/caregiver thinks I should.                                                   | <input type="checkbox"/> | <input type="checkbox"/> | <input type="checkbox"/> | <input type="checkbox"/> |
| b. I want to exercise if my parent/caregiver thinks I should.                                                        | <input type="checkbox"/> | <input type="checkbox"/> | <input type="checkbox"/> | <input type="checkbox"/> |
| c. I want to set goals to improve my eating and physical activity habits if my parent/caregiver thinks I should.     | <input type="checkbox"/> | <input type="checkbox"/> | <input type="checkbox"/> | <input type="checkbox"/> |
| d. I want to write in a journal about my eating and physical activity habits if my parent/caregiver thinks I should. | <input type="checkbox"/> | <input type="checkbox"/> | <input type="checkbox"/> | <input type="checkbox"/> |
| e. I want to help plan, shop for, or make healthy foods if my parent/caregiver thinks I should.                      | <input type="checkbox"/> | <input type="checkbox"/> | <input type="checkbox"/> | <input type="checkbox"/> |

| 7. Do you think you can ...                                                                   | No, Not At All           | No, Not Really           | Yes, A Little            | Yes, For Sure            |
|-----------------------------------------------------------------------------------------------|--------------------------|--------------------------|--------------------------|--------------------------|
| a. Talk with your family about how you can eat healthier foods or get more physical activity? | <input type="checkbox"/> | <input type="checkbox"/> | <input type="checkbox"/> | <input type="checkbox"/> |
| b. Help plan for, shop, or make healthy foods each week?                                      | <input type="checkbox"/> | <input type="checkbox"/> | <input type="checkbox"/> | <input type="checkbox"/> |
| c. Use nutrition facts labels on packages to pick healthy foods?                              | <input type="checkbox"/> | <input type="checkbox"/> | <input type="checkbox"/> | <input type="checkbox"/> |
| d. Choose healthy foods and drinks at home?                                                   | <input type="checkbox"/> | <input type="checkbox"/> | <input type="checkbox"/> | <input type="checkbox"/> |
| e. Choose healthy foods and drinks at restaurants, including fast food restaurants?           | <input type="checkbox"/> | <input type="checkbox"/> | <input type="checkbox"/> | <input type="checkbox"/> |
| f. Plan what physical activities you will do for the week?                                    | <input type="checkbox"/> | <input type="checkbox"/> | <input type="checkbox"/> | <input type="checkbox"/> |
| g. Exercise for one hour every day?                                                           | <input type="checkbox"/> | <input type="checkbox"/> | <input type="checkbox"/> | <input type="checkbox"/> |
| h. Exercise even if things get in your way, like if you are too tired or very busy?           | <input type="checkbox"/> | <input type="checkbox"/> | <input type="checkbox"/> | <input type="checkbox"/> |
| i. Choose to be active instead of watching TV or sitting at the computer?                     | <input type="checkbox"/> | <input type="checkbox"/> | <input type="checkbox"/> | <input type="checkbox"/> |
| j. Do bone-strengthening physical activities like running or jumping rope?                    | <input type="checkbox"/> | <input type="checkbox"/> | <input type="checkbox"/> | <input type="checkbox"/> |

|                                                                                                                                                                                                                                                                                                                 |                                                                            |                                                                 |                                                          |                                     |
|-----------------------------------------------------------------------------------------------------------------------------------------------------------------------------------------------------------------------------------------------------------------------------------------------------------------|----------------------------------------------------------------------------|-----------------------------------------------------------------|----------------------------------------------------------|-------------------------------------|
| <b>8. The most important time in life for building strong bones is when you are a/an...</b>                                                                                                                                                                                                                     |                                                                            |                                                                 |                                                          |                                     |
| <input type="checkbox"/> Baby or young child (ages 0-8)<br><input type="checkbox"/> Preteen or teen (ages 9-18)<br><input type="checkbox"/> Young adult (ages 19-29)<br><input type="checkbox"/> Adult (ages 30 to 54)<br><input type="checkbox"/> Older adult (age 55+)<br><input type="checkbox"/> Don't know |                                                                            |                                                                 |                                                          |                                     |
| <b>9. The amount of food you choose to eat for a meal or a snack...</b>                                                                                                                                                                                                                                         |                                                                            |                                                                 |                                                          |                                     |
| <input type="checkbox"/> Serving                                                                                                                                                                                                                                                                                | <input type="checkbox"/> Plate                                             | <input type="checkbox"/> Portion Size                           | <input type="checkbox"/> Don't know                      |                                     |
| <b>10. A measured amount of food or drink that you can find on a nutrition facts label is the...</b>                                                                                                                                                                                                            |                                                                            |                                                                 |                                                          |                                     |
| <input type="checkbox"/> Recipe                                                                                                                                                                                                                                                                                 | <input type="checkbox"/> Portion Size                                      | <input type="checkbox"/> Serving                                | <input type="checkbox"/> Don't know                      |                                     |
| <b>11. The dangers of unhealthy dieting to lose weight can be: (Choose one or more.)</b>                                                                                                                                                                                                                        |                                                                            |                                                                 |                                                          |                                     |
| <input type="checkbox"/> Not getting enough nutrients to grow and develop<br><input type="checkbox"/> Higher risk for diseases like osteoporosis or diabetes<br><input type="checkbox"/> Higher risk for being overweight<br><input type="checkbox"/> Don't know                                                |                                                                            |                                                                 |                                                          |                                     |
| <b>12. Which foods contain calcium? (Choose one or more.)</b>                                                                                                                                                                                                                                                   |                                                                            |                                                                 |                                                          |                                     |
| <input type="checkbox"/> Milk                                                                                                                                                                                                                                                                                   | <input type="checkbox"/> Fortified orange juice                            | <input type="checkbox"/> Peaches                                | <input type="checkbox"/> Water                           | <input type="checkbox"/> Don't know |
| <b>13. Which foods contain vitamin D? (Choose one or more.)</b>                                                                                                                                                                                                                                                 |                                                                            |                                                                 |                                                          |                                     |
| <input type="checkbox"/> Salmon                                                                                                                                                                                                                                                                                 | <input type="checkbox"/> Chicken                                           | <input type="checkbox"/> Fortified Milk                         | <input type="checkbox"/> Spinach                         | <input type="checkbox"/> Don't know |
| <b>14. Which sandwich has less fat?</b>                                                                                                                                                                                                                                                                         |                                                                            |                                                                 |                                                          |                                     |
| <input type="checkbox"/> Fried chicken sandwich                                                                                                                                                                                                                                                                 | <input type="checkbox"/> Grilled chicken sandwich                          | <input type="checkbox"/> They both have the same amount of fat  | <input type="checkbox"/> Don't know                      |                                     |
| <b>15. How can physical activity help you? (Choose one or more.)</b>                                                                                                                                                                                                                                            |                                                                            |                                                                 |                                                          |                                     |
| <input type="checkbox"/> Helps you control your weight                                                                                                                                                                                                                                                          | <input type="checkbox"/> Lowers your chance of getting high blood pressure | <input type="checkbox"/> Helps you feel less stressed           | <input type="checkbox"/> Decreases your vitamin C levels | <input type="checkbox"/> Don't know |
| <b>16. To strengthen your bones you should:</b>                                                                                                                                                                                                                                                                 |                                                                            |                                                                 |                                                          |                                     |
| <input type="checkbox"/> Swim 3 times a week                                                                                                                                                                                                                                                                    | <input type="checkbox"/> Do stretching exercises, like touching your toes  | <input type="checkbox"/> Do activities like jumping and dancing | <input type="checkbox"/> Don't know                      |                                     |

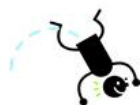

**Just two pages left. You're doing great!**

| 17. Tell us about the <u>past 7 days</u> . On how many days did you...      | 0 Days                   | 1-2 Day                  | 3-4 Days                 | 5-7 Days                 |
|-----------------------------------------------------------------------------|--------------------------|--------------------------|--------------------------|--------------------------|
| a. Write in a journal what you ate and how much physical activity you did?  | <input type="checkbox"/> | <input type="checkbox"/> | <input type="checkbox"/> | <input type="checkbox"/> |
| b. Work toward goals you set to eat healthy foods and be physically active? | <input type="checkbox"/> | <input type="checkbox"/> | <input type="checkbox"/> | <input type="checkbox"/> |
| c. Help plan healthy meals and snacks?                                      | <input type="checkbox"/> | <input type="checkbox"/> | <input type="checkbox"/> | <input type="checkbox"/> |
| d. Help shop for healthy foods and drinks?                                  | <input type="checkbox"/> | <input type="checkbox"/> | <input type="checkbox"/> | <input type="checkbox"/> |
| e. Help make healthy meals or snacks?                                       | <input type="checkbox"/> | <input type="checkbox"/> | <input type="checkbox"/> | <input type="checkbox"/> |
| f. Eat a healthy breakfast?                                                 | <input type="checkbox"/> | <input type="checkbox"/> | <input type="checkbox"/> | <input type="checkbox"/> |
| g. Take a healthy bag lunch to school?                                      | <input type="checkbox"/> | <input type="checkbox"/> | <input type="checkbox"/> | <input type="checkbox"/> |
| h. Eat dinner together with your family?                                    | <input type="checkbox"/> | <input type="checkbox"/> | <input type="checkbox"/> | <input type="checkbox"/> |
| i. Exercise for one hour?                                                   | <input type="checkbox"/> | <input type="checkbox"/> | <input type="checkbox"/> | <input type="checkbox"/> |
| j. Exercise with your parent or caregiver?                                  | <input type="checkbox"/> | <input type="checkbox"/> | <input type="checkbox"/> | <input type="checkbox"/> |
| k. Do bone-strengthening exercises (like walking or jumping rope)?          | <input type="checkbox"/> | <input type="checkbox"/> | <input type="checkbox"/> | <input type="checkbox"/> |

| 18. Think about the past 7 days. Did your parent/caregiver encourage you to...                                           | No                       | Yes                      |
|--------------------------------------------------------------------------------------------------------------------------|--------------------------|--------------------------|
| a. Eat a healthy mix of foods like fruits, vegetables, whole grains, low-fat or fat-free dairy foods, and protein foods? | <input type="checkbox"/> | <input type="checkbox"/> |
| b. Exercise each day for one hour?                                                                                       | <input type="checkbox"/> | <input type="checkbox"/> |
| c. Set goals to improve your eating and physical activity habits?                                                        | <input type="checkbox"/> | <input type="checkbox"/> |
| d. Write in a journal about your eating and physical activity habits?                                                    | <input type="checkbox"/> | <input type="checkbox"/> |
| e. Help plan, shop for, or make healthy foods?                                                                           | <input type="checkbox"/> | <input type="checkbox"/> |
| f. Be active instead of watching TV and/or sitting at the computer?                                                      | <input type="checkbox"/> | <input type="checkbox"/> |

| 19. Think about what you eat on an AVERAGE DAY. How many times do you eat or drink... | 0 Times                  | 1 Time                   | 2 Times                  | 3 Times                  | 4 Times                  | 5+ Times                 |
|---------------------------------------------------------------------------------------|--------------------------|--------------------------|--------------------------|--------------------------|--------------------------|--------------------------|
| a. Dairy foods like milk, yogurt, cheese, and fortified soy beverages?                | <input type="checkbox"/> |
| b. Soda or pop?                                                                       | <input type="checkbox"/> |
| c. Fruits (including 100% fruit juice)?                                               | <input type="checkbox"/> |
| d. Protein foods like meats, poultry, seafood, beans, and tofu?                       | <input type="checkbox"/> |
| e. Chips or French fries?                                                             | <input type="checkbox"/> |
| f. Vegetables?                                                                        | <input type="checkbox"/> |
| g. Candy, cookies, cake, or other sweets?                                             | <input type="checkbox"/> |
| h. Grains like bread, oatmeal, and rice?                                              | <input type="checkbox"/> |

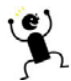

Just one to go!

**20a. Not including BodyWorks and PE or health class at school, did you go to any education programs about healthy eating or physical activity in the last 8 weeks?**

No

Yes

**20b. If you checked "yes," please describe the program:** \_\_\_\_\_

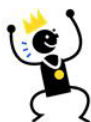

**You've reached the end. Thank you for your help!**

**CHILDREN’S SLEEP HABITS QUESTIONNAIRE  
(ABBREVIATED)**

The following statements are about your child’s sleep habits and possible difficulties with sleep. Think about the past week in your life when you answer the questions. If last week was unusual for a specific reason, choose the most recent typical week. Unless noted, check Always if something occurs every night, Usually if it occurs 5 or 6 times a week, Sometimes if it occurs 2 to 4 times a week, Rarely if it occurs once a week, and Never if it occurs less than once a week.

**BEDTIME**

Write in your child’s usual bedtime: Weeknights \_\_\_\_\_:\_\_\_\_\_ am/pm

Weekends \_\_\_\_\_:\_\_\_\_\_ am/pm

|                                                                                             | 7<br>Always | 5-6<br>Usually | 2-4<br>Sometimes | 1<br>Rarely | 0<br>Never |
|---------------------------------------------------------------------------------------------|-------------|----------------|------------------|-------------|------------|
| 1. Child goes to bed at the same time at night.                                             | ( )         | ( )            | ( )              | ( )         | ( )        |
| 2. Child falls asleep within 20 minutes after going to bed.                                 | ( )         | ( )            | ( )              | ( )         | ( )        |
| 3. Child falls asleep alone in own bed.                                                     | ( )         | ( )            | ( )              | ( )         | ( )        |
| 4. Child falls asleep in parent’s or sibling’s bed.                                         | ( )         | ( )            | ( )              | ( )         | ( )        |
| 5. Child falls asleep with rocking or rhythmic movements.                                   | ( )         | ( )            | ( )              | ( )         | ( )        |
| 6. Child needs special object to fall asleep (doll, special blanket, stuffed animal, etc.). | ( )         | ( )            | ( )              | ( )         | ( )        |
| 7. Child needs parent in the room to fall asleep.                                           | ( )         | ( )            | ( )              | ( )         | ( )        |
| 8. Child resists going to bed at bedtime.                                                   | ( )         | ( )            | ( )              | ( )         | ( )        |
| 9. Child is afraid of sleeping in the dark.                                                 | ( )         | ( )            | ( )              | ( )         | ( )        |

**SLEEP BEHAVIOR**

Write in your child’s usual amount of sleep each day (combining nighttime sleep and naps): \_\_\_\_\_ hours and \_\_\_\_\_ minutes

|                                                     | 7<br>Always | 5-6<br>Usually | 2-4<br>Sometimes | 1<br>Rarely | 0<br>Never |
|-----------------------------------------------------|-------------|----------------|------------------|-------------|------------|
| 10. Child sleeps about the same amount each day.    | ( )         | ( )            | ( )              | ( )         | ( )        |
| 11. Child is restless and moves a lot during sleep. | ( )         | ( )            | ( )              | ( )         | ( )        |

|                                                                                  | 7<br>Always | 5-6<br>Usually | 2-4<br>Sometimes | 1<br>Rarely | 0<br>Never |
|----------------------------------------------------------------------------------|-------------|----------------|------------------|-------------|------------|
| 12. Child moves to someone else's bed during the night (parent, sibling, etc.).  | ( )         | ( )            | ( )              | ( )         | ( )        |
| 13. Child grinds teeth during sleep (your dentist may have told you this).       | ( )         | ( )            | ( )              | ( )         | ( )        |
| 14. Child snores loudly.                                                         | ( )         | ( )            | ( )              | ( )         | ( )        |
| 15. Child awakens during the night and is sweating, screaming, and inconsolable. | ( )         | ( )            | ( )              | ( )         | ( )        |
| 16. Child naps during the day.                                                   | ( )         | ( )            | ( )              | ( )         | ( )        |
| Write in the number of minutes the nap usually lasts: _____ minutes              |             |                |                  |             |            |

**WAKING DURING THE NIGHT**

|                                                     | 7<br>Always | 5-6<br>Usually | 2-4<br>Sometimes | 1<br>Rarely | 0<br>Never |
|-----------------------------------------------------|-------------|----------------|------------------|-------------|------------|
| 17. Child wakes up once during the night.           | ( )         | ( )            | ( )              | ( )         | ( )        |
| 18. Child wakes up more than once during the night. | ( )         | ( )            | ( )              | ( )         | ( )        |

**MORNING WAKE UP**

Write in the time child usually wakes up in the morning: Weekdays \_\_\_\_\_:\_\_\_\_\_ am/pm

Weekends \_\_\_\_\_:\_\_\_\_\_ am/pm

|                                                                                       | 7<br>Always | 5-6<br>Usually | 2-4<br>Sometimes | 1<br>Rarely | 0<br>Never |
|---------------------------------------------------------------------------------------|-------------|----------------|------------------|-------------|------------|
| 19. Child wakes up by him/herself.                                                    | ( )         | ( )            | ( )              | ( )         | ( )        |
| 20. Child wakes up very early in the morning (or, earlier than necessary or desired). | ( )         | ( )            | ( )              | ( )         | ( )        |
| 21. Child seems tired during the daytime.                                             | ( )         | ( )            | ( )              | ( )         | ( )        |
| 22. Child falls asleep while involved in activities.                                  | ( )         | ( )            | ( )              | ( )         | ( )        |

## WEEKLY ACTIVITY JOURNAL

Name: \_\_\_\_\_

Date: \_\_\_\_\_

### Instructions

For each day of the week, please check the appropriate box for the activity you engaged in on that day (if you did not do physical activity on a certain day, please leave it blank). If the activity you participated in is not listed, please check "Other" and write in the activity next to it.

Then, write in how much time that you did the activity for.

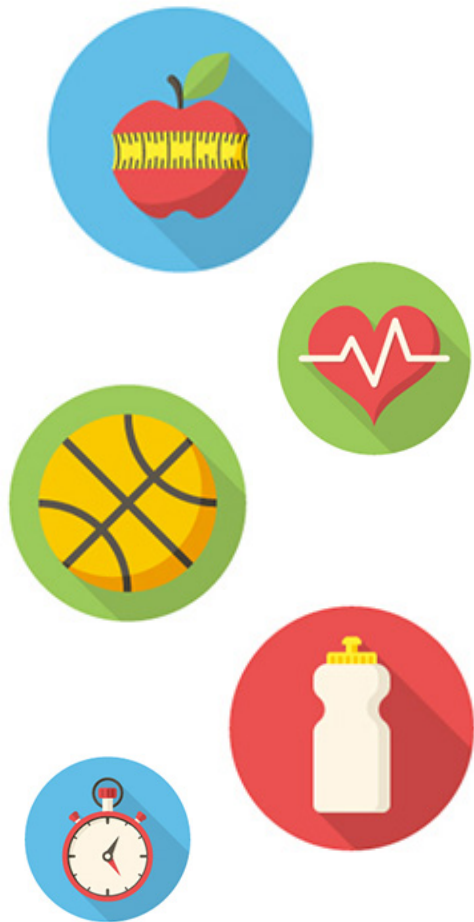

|                                                                                                                                               |      |
|-----------------------------------------------------------------------------------------------------------------------------------------------|------|
| <b>SUNDAY</b>                                                                                                                                 |      |
| Activity                                                                                                                                      | Time |
| <input type="checkbox"/> Walk<br><input type="checkbox"/> Run<br><input type="checkbox"/> Sports/Athletics<br><input type="checkbox"/> Other: |      |
| <b>MONDAY</b>                                                                                                                                 |      |
| Activity                                                                                                                                      | Time |
| <input type="checkbox"/> Walk<br><input type="checkbox"/> Run<br><input type="checkbox"/> Sports/Athletics<br><input type="checkbox"/> Other: |      |
| <b>TUESDAY</b>                                                                                                                                |      |
| Activity                                                                                                                                      | Time |
| <input type="checkbox"/> Walk<br><input type="checkbox"/> Run<br><input type="checkbox"/> Sports/Athletics<br><input type="checkbox"/> Other: |      |
| <b>WEDNESDAY</b>                                                                                                                              |      |
| Activity                                                                                                                                      | Time |
| <input type="checkbox"/> Walk<br><input type="checkbox"/> Run<br><input type="checkbox"/> Sports/Athletics<br><input type="checkbox"/> Other: |      |
| <b>THURSDAY</b>                                                                                                                               |      |
| Activity                                                                                                                                      | Time |
| <input type="checkbox"/> Walk<br><input type="checkbox"/> Run<br><input type="checkbox"/> Sports/Athletics<br><input type="checkbox"/> Other: |      |
| <b>FRIDAY</b>                                                                                                                                 |      |
| Activity                                                                                                                                      | Time |
| <input type="checkbox"/> Walk<br><input type="checkbox"/> Run<br><input type="checkbox"/> Sports/Athletics<br><input type="checkbox"/> Other: |      |
| <b>SATURDAY</b>                                                                                                                               |      |
| Activity                                                                                                                                      | Time |
| <input type="checkbox"/> Walk<br><input type="checkbox"/> Run<br><input type="checkbox"/> Sports/Athletics<br><input type="checkbox"/> Other: |      |



Study Number: CHLA-15-00269

Principal Investigator: Juan Espinoza

Study Title: Effect of Personal Activity Trackers on Weight Loss in Children Enrolled in a Comprehensive Behavioral Family Lifestyle Intervention (CBFLI) Program

**Fitbit Intervention Exit Survey**

1. The Fitbit was comfortable to wear.
  - a. Strongly Agree
  - b. Agree
  - c. Neutral
  - d. Disagree
  - e. Strongly Disagree
  
2. The Fitbit was easy to charge.
  - a. Strongly Agree
  - b. Agree
  - c. Neutral
  - d. Disagree
  - e. Strongly Disagree
  
3. I enjoyed using the Fitbit.
  - a. Strongly Agree
  - b. Agree
  - c. Neutral
  - d. Disagree
  - e. Strongly Disagree
  
4. I was motivated to do more activity by wearing the Fitbit
  - a. Strongly Agree
  - b. Agree
  - c. Neutral
  - d. Disagree
  - e. Strongly Disagree
  
5. The weekly Fitbit reports and feedback were useful for me.
  - a. Strongly Agree
  - b. Agree
  - c. Neutral
  - d. Disagree
  - e. Strongly Disagree
  
6. I will consider getting my own Fitbit, or a similar device, in the future.
  - a. Strongly Agree
  - b. Agree
  - c. Neutral
  - d. Disagree
  - e. Strongly Disagree
